# Supplementary material for: Tailoring the d-band center of porous CoS2 nanospheres via low-electronegative Fe for weakened OH* adsorption and boosted oxygen evolution
Source: Royal Society of Chemistry journal article supplement (doi:10.1039/d3qi00902e), 2023-01-01
Supplement: d3qi00902e1.pdf [file d3qi00902e1.pdf]

## Supplementary Material

# Tailoring d-band Center of Porous CoS<sub>2</sub> Nanospheres via Low-Electronegative Fe for Weakened OH\* Adsorption and Boosted Oxygen Evolution

Heyuan Chen<sup>a</sup>, Wei Wu<sup>a</sup>, Suhao Chen<sup>a</sup>, Zichen Wang<sup>a</sup>, Runzhe Chen<sup>a</sup>, Niancai Cheng<sup>\*a,b</sup>

<sup>a</sup> College of Materials Science and Engineering, Fuzhou University, Fuzhou 350108, Fujian, China. E-mail address: [niancaicheng@fzu.edu.cn](mailto:niancaicheng@fzu.edu.cn).

<sup>b</sup> Key Laboratory of Advanced Energy Materials Chemistry (Ministry of Education), Nankai University, Tianjin 300071, China

\*Corresponding author. E-mail address: [niancaicheng@fzu.edu.cn](mailto:niancaicheng@fzu.edu.cn) (N. C. Cheng).

### Experimental section

**Reagents.** All the chemicals used were commercial without any further purification. Zinc nitrate hexahydrate (Zn(NO<sub>3</sub>)<sub>2</sub>·6H<sub>2</sub>O; >99.0%, Sinopharm Chemical Reagent Co., Ltd.), Ferric nitrate nonahydrate (Fe(NO<sub>3</sub>)<sub>3</sub>·9H<sub>2</sub>O; >99.0%, Sinopharm Chemical Reagent Co., Ltd.), Cobalt nitrate hexahydrate (Co(NO<sub>3</sub>)<sub>2</sub>·6H<sub>2</sub>O; >99.0%, Sinopharm Chemical Reagent Co., Ltd.), 2-methyleimidazole (99.0%, Aladdin), sulfur powder(99.9%, Sinopharm Chemical Reagent Co., Ltd.), potassium hydroxide (KOH; 85%, Sinopharm Chemical Reagent Co., Ltd.) and de-ionized water with the specific resistance of 18.25 MΩ·cm<sup>-1</sup> (obtained by reversed osmosis followed by ion-exchange and filtration).

### Characterizations

Characterization: Scanning electron microscopy (SEM) was performed on a SUPRA 55. Transmission electron microscopy (TEM) images and Wide-angle X-ray diffraction (XRD, D-MAX 2200 VPC) patterns. X-ray photoelectron spectroscopy (XPS) characterization was performed by an K-Alpha. The nitrogen absorption-desorption isotherms were measured using the equipment of Micromeritics 3Flex. Raman spectra was performed

by DXR2Xi. The total specific surface area was calculated from the Brunauer-Emmett-Teller (BET) equation. The pore size distribution (PSD) curves were calculated by the nonlocal density functional theory (DFT).

**Electrochemical Measurements.** The electrochemical tests were measured with a three-electrode system on an electrochemical workstation (CHI660E). A glassy carbon electrode (diameter of 5 mm with surface area of  $0.196 \text{ cm}^2$ ) was used as a working electrode, while a carbon rod was utilized as the counter electrode. Hg/HgO electrode was used as the reference electrode. In respect of preparing working electrode, 4 mg catalysts mixed with 20  $\mu\text{L}$  Nafion solution (Sigma Aldrich, 5 wt%) were dispersed in 800  $\mu\text{L}$  of water–isopropanol solution with volume ratio of 1:1 by sonicating for at least 10 min to form a homogeneous ink. The catalyst ink was then drop-casted onto the glassy carbon electrode with a  $0.38 \text{ mg cm}^{-2}$  loading for all samples. Oxygen was used to purge the 1 M KOH solution for 30 min to keep the solution oxygen saturation before OER catalytic activity testing. Before LSV tests, the working electrodes were stabilized by CV test at a scan rate of  $100 \text{ mV s}^{-1}$  from 1.2 to 1.6 V (vs RHE) for 30 cycles. The LSV polarization curves of OER process were conducted at a rate of  $5 \text{ mV s}^{-1}$  with ohmic potential drop (iR) correction. The electrochemical impedance spectroscopy (EIS) measurements are carried out in the frequency range from 10 kHz to 0.1 Hz. The electrode durability was tested by repetitive CV scan for 1000 cycles in a potential window of 1.2 to 1.6 V (vs RHE) and Chronopotentiometry measurement of  $10 \text{ mA cm}^{-2}$  for 10000 s. The  $C_{dl}$  was calculated by performing CV measurements at different scan rates of 20, 40, 60, 80 and  $100 \text{ mV s}^{-1}$  in the potential range of 1.00–1.10 V (vs RHE). The value of  $C_{dl}$  was a half of the linear slope obtained from plotting  $\Delta j = j_a - j_c$  at 1.05 V against the scan rates ( $j_a$  and  $j_c$  are anode and cathode current density, respectively). The TOF value was calculated by the following equation:  $\text{TOF} = j \cdot S / \alpha \cdot F \cdot n$ , where  $j$  is the current density ( $\text{mA cm}^{-2}$ ) at  $\eta = 310 \text{ mV}$ ,  $S$  represents the surface area of as-prepared electrode, the  $\alpha$  means the electron number of the target product (electrons/mol),  $F$  is the Faraday's constant ( $96485.3 \text{ C mol}^{-1}$ ), and  $n$  represents the moles of Co atoms on the electrode which can be calculated by the loading weight and the molecular weight of the coated catalysts. The Faraday efficiency (FE) was calculated by

the following equation:  $FE = V_{\text{exp}}/V_{\text{theo}}$  where  $V_{\text{exp}}$  and  $V_{\text{theo}}$  are the volume of the generated  $\text{O}_2$  gas (mL) and the calculated volume of  $\text{O}_2$  (mL), respectively. The latter was calculated based on the equation of  $V_{\text{theo}} = V_M Q/nF$ , where  $V_M$  is the molar volume of the ideal gas ( $24.5 \text{ L mol}^{-1}$ ),  $Q$  is electric charge quantity (C),  $n$  is electron transferred number ( $n = 4$  for OER), and  $F$  is the Faraday constant ( $96,485 \text{ C mol}^{-1}$ ). All the potentials were calibrated to the reversible hydrogen electrode (vs RHE), and the corresponding equation is  $E_{\text{RHE}} = E_{\text{Hg/HgO}} + 0.098 + 0.059\text{pH}$ .

### Density functional theory (DFT) calculations.

Density functional theory (DFT) calculations were used to optimize the lattice constants and ionic positions of the pristine  $\text{CoOOH}$ ,  $\text{Fe}_{0.25}\text{Co}_{0.75}\text{OOH}$ ,  $\text{Fe}_{0.50}\text{Co}_{0.50}\text{OOH}$ ,  $\text{Fe}_{0.75}\text{Co}_{0.25}\text{OOH}$  and  $\text{FeOOH}$  structure. It is reasonable to choose the kinetic energy cutoff for plane wave expansion at 450 eV and a  $3 \times 3 \times 1$  Monkhorst-Pack k-point grid sampling of the first Brillouin zone. In order to determine the occupancy, we set the Gaussian smearing width to 0.1 eV. The adsorption surface, of which the unit lattice constant is set to  $12.215 \text{ \AA} \times 12.215 \text{ \AA}$  and the vacuum layer is set to 30  $\text{ \AA}$ , was calculated the structural relaxation by using a conjugate gradient algorithm, limiting the maximum force and energy of unconstrained atoms to less than 0.01 eV/ $\text{ \AA}$  and  $1 \times 10^{-6}$  eV, 6 respectively. The electronic iteration convergence value for self-consistent field (SCF) calculation was set to  $1 \times 10^{-6}$  eV.

The thermodynamic model of water oxidation proposed by Norskov and coworkers, which is composed of four electrochemical steps, each of which constitutes one proton transfer, was used in this work. The following electron reaction paths are considered for the oxygen evolution reaction (OER) process:

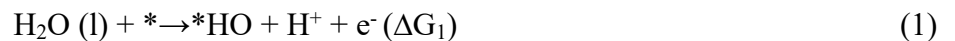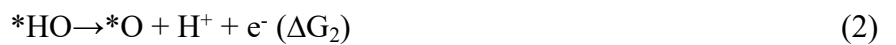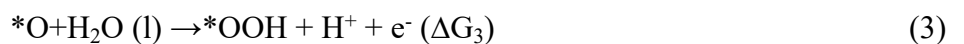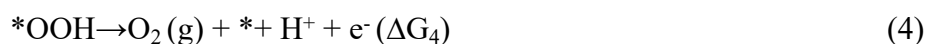

The adsorption energies ( $\Delta E_{\text{ads}}$ ) of  $\text{OOH}^*$ ,  $\text{OH}^*$  and  $\text{O}^*$  are calculated by referring their DFT total energy, and  $\text{H}_2\text{O}$  and  $\text{H}_2$  in the gas phase. The adsorption free energy ( $\Delta G_{\text{ads}}$ ) is obtained by

$$\Delta G_{\text{ads}} = \Delta E_{\text{ads}} + \Delta \text{ZPE} - T\Delta S \quad (5)$$

where  $\Delta \text{ZPE}$  and  $\Delta S$  are the contributions to the free energy from the zero-point vibration energy and entropy, respectively. For each reaction step in OER, the Gibbs free energy of formation is given by

$$\Delta G = \Delta E_{\text{DFT}} + \Delta \text{ZPE} - T\Delta S - eU \quad (6)$$

where  $\Delta E_{\text{DFT}}$ ,  $\Delta \text{ZPE}$  and  $\Delta S$  are the change of DFT total energy, zero-point energy, and entropy from the initial to the final state;  $U$  is the electrode potential and  $e$  is the charge transferred. The reference potential is set to be that of the standard hydrogen electrode.

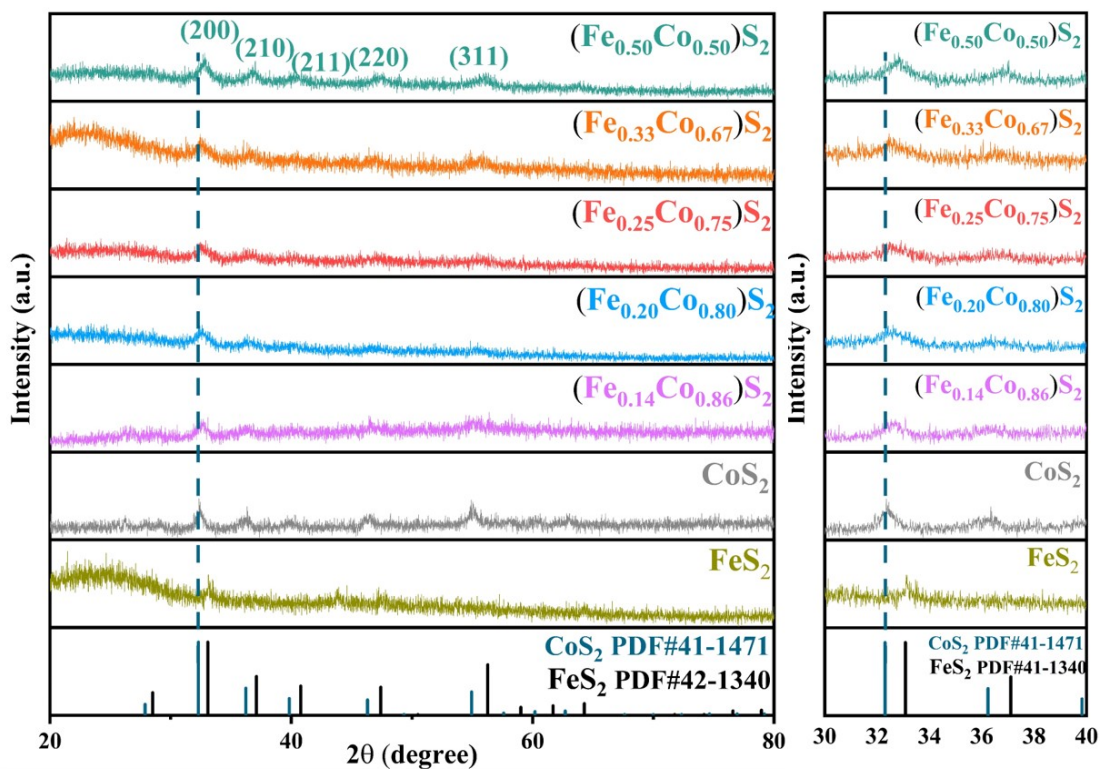

**Fig. S1** XRD patterns of  $\text{CoS}_2$ ,  $(\text{Fe}_{0.50}\text{Co}_{0.50})\text{S}_2$ ,  $(\text{Fe}_{0.33}\text{Co}_{0.67})\text{S}_2$ ,  $(\text{Fe}_{0.25}\text{Co}_{0.75})\text{S}_2$ ,  $(\text{Fe}_{0.20}\text{Co}_{0.80})\text{S}_2$ ,  $(\text{Fe}_{0.14}\text{Co}_{0.86})\text{S}_2$  and  $\text{FeS}_2$ .

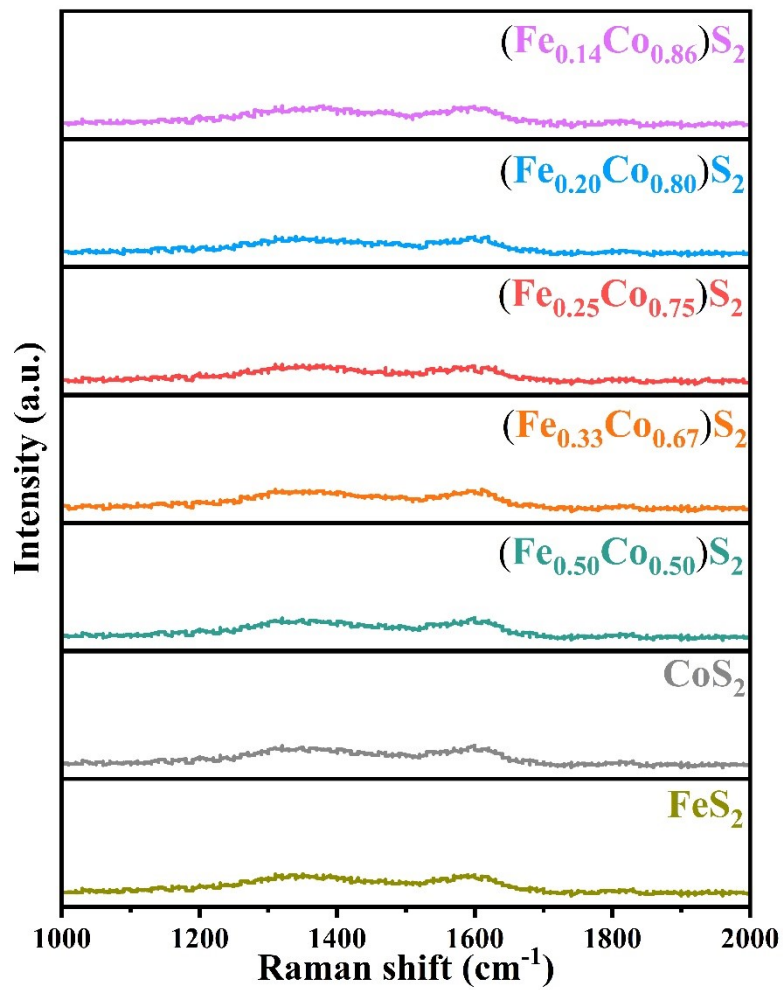

Fig. S2 Raman spectra of  $(\text{Fe}_x\text{Co}_{1-x})\text{S}_2$ .

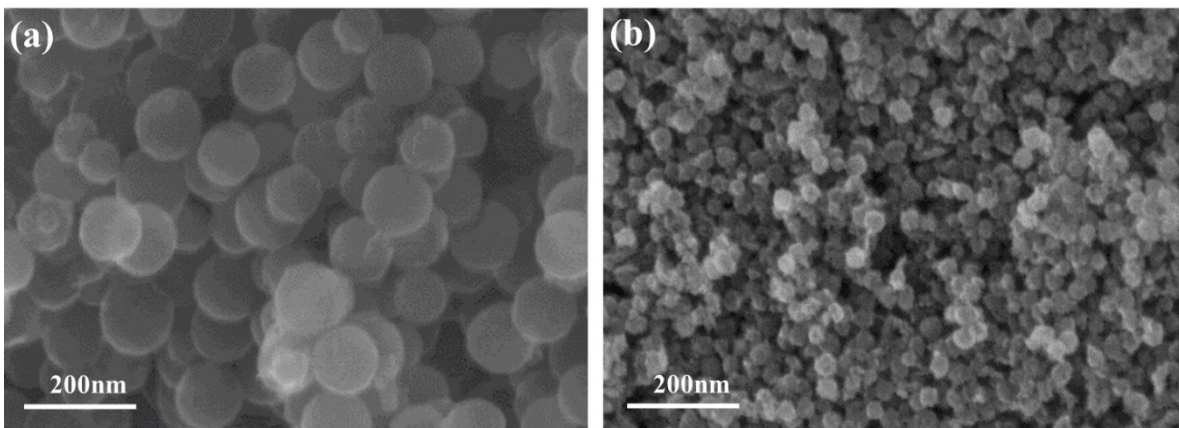

**Fig. S3** SEM images of (a, b) spherical ZIF-8 and Fe-Co<sub>3</sub>O<sub>4</sub>.

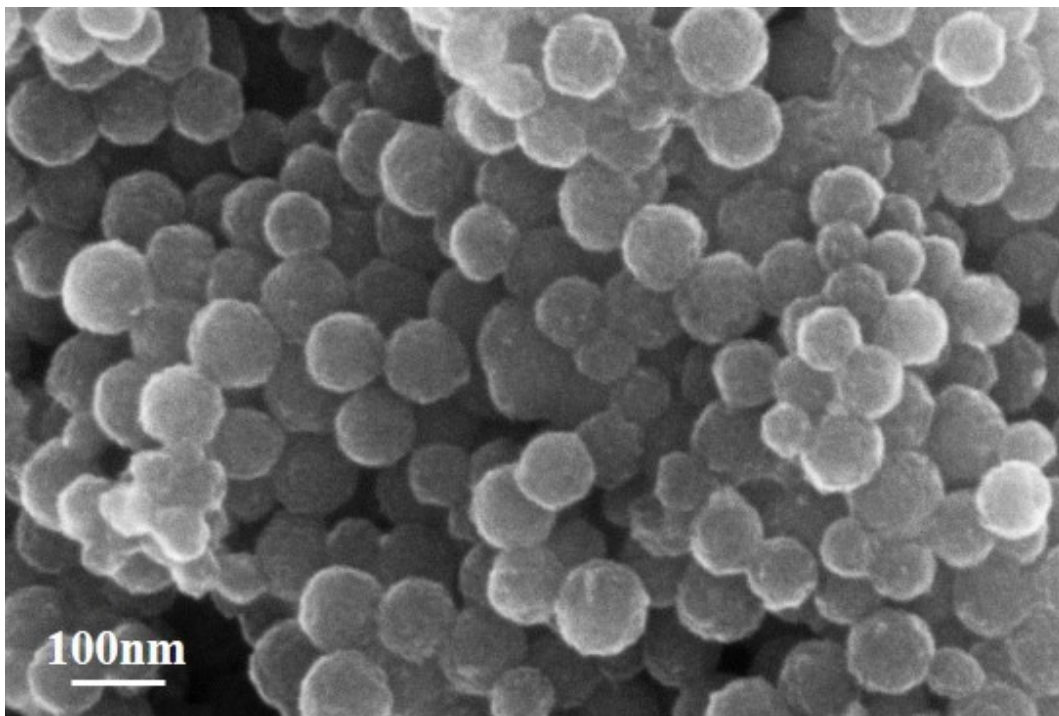

**Fig. S4** SEM images of  $\text{CoS}_2$ .



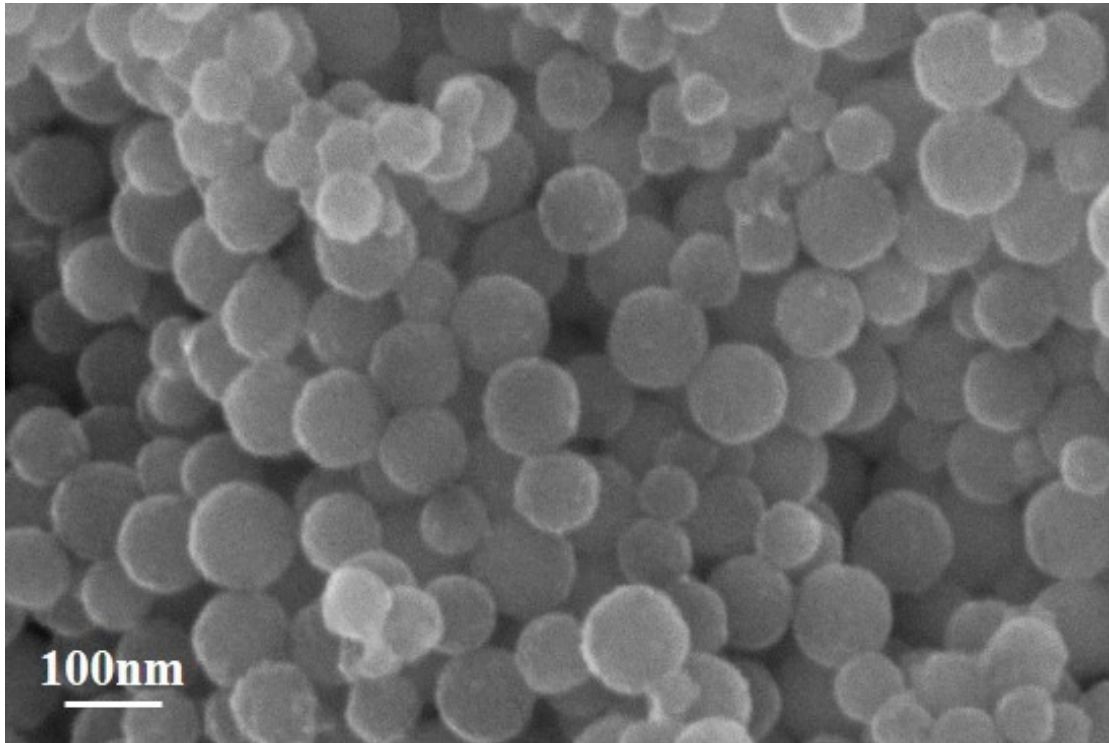

**Fig. S5** SEM images of  $(\text{Fe}_{0.50}\text{Co}_{0.50})\text{S}_2$ .

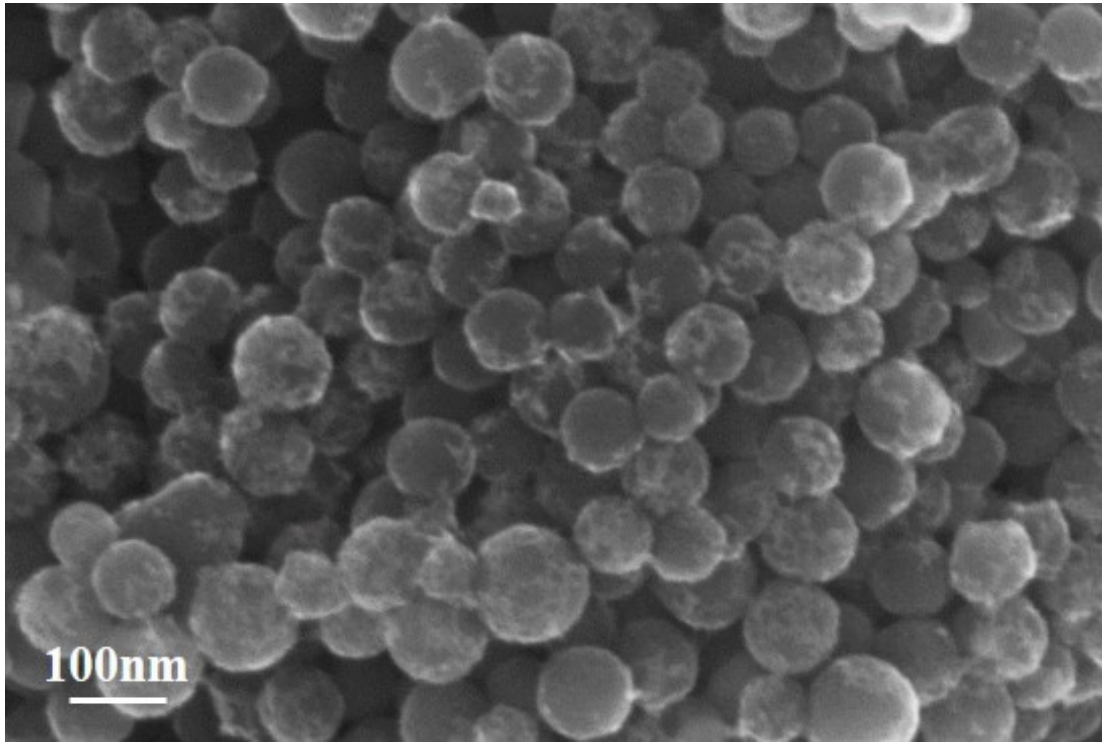

**Fig. S6** SEM images of  $(\text{Fe}_{0.33}\text{Co}_{0.67})\text{S}_2$ .

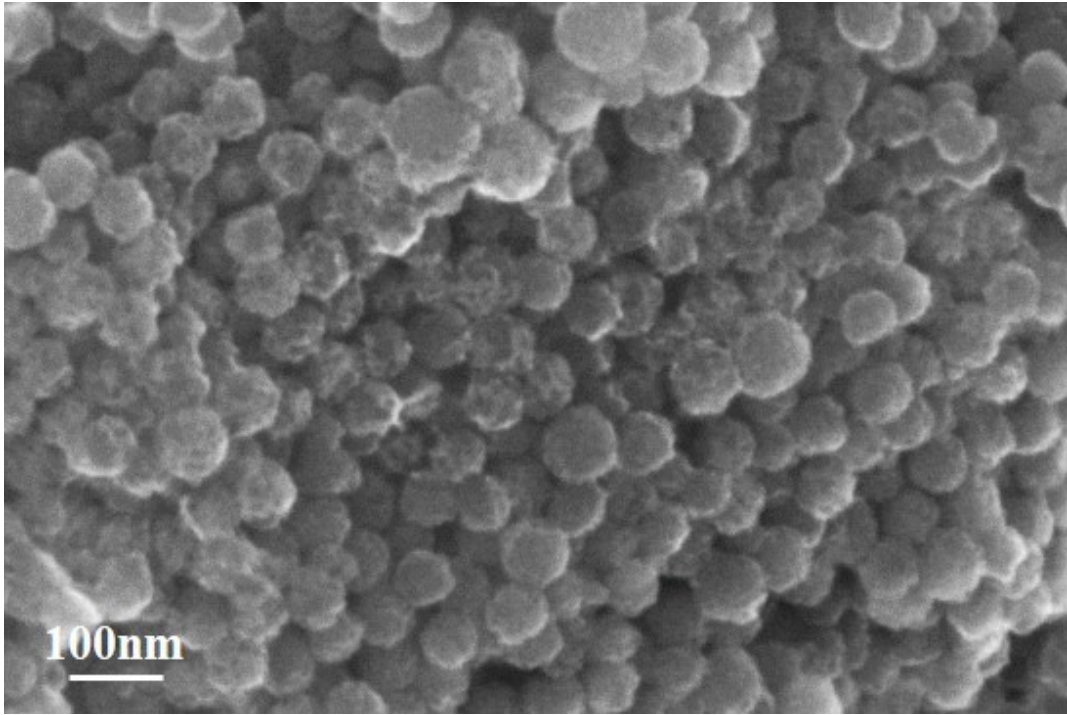

**Fig. S7** SEM images of  $(\text{Fe}_{0.25}\text{Co}_{0.75})\text{S}_2$ .

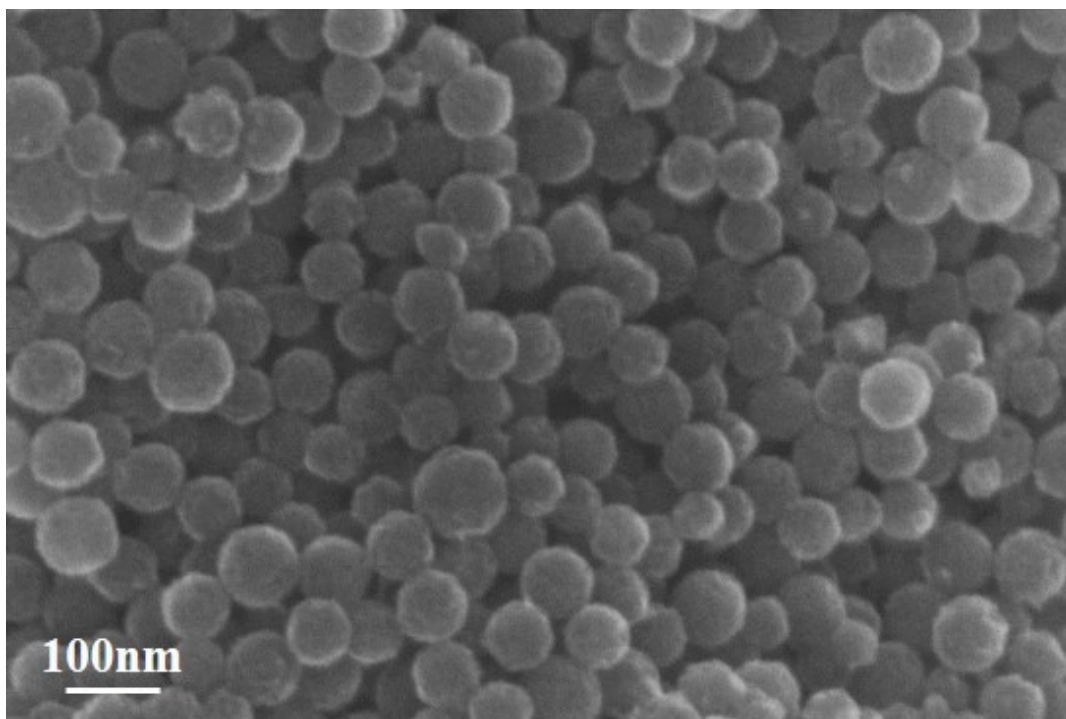

**Fig. S8** SEM images of  $(\text{Fe}_{0.20}\text{Co}_{0.80})\text{S}_2$ .

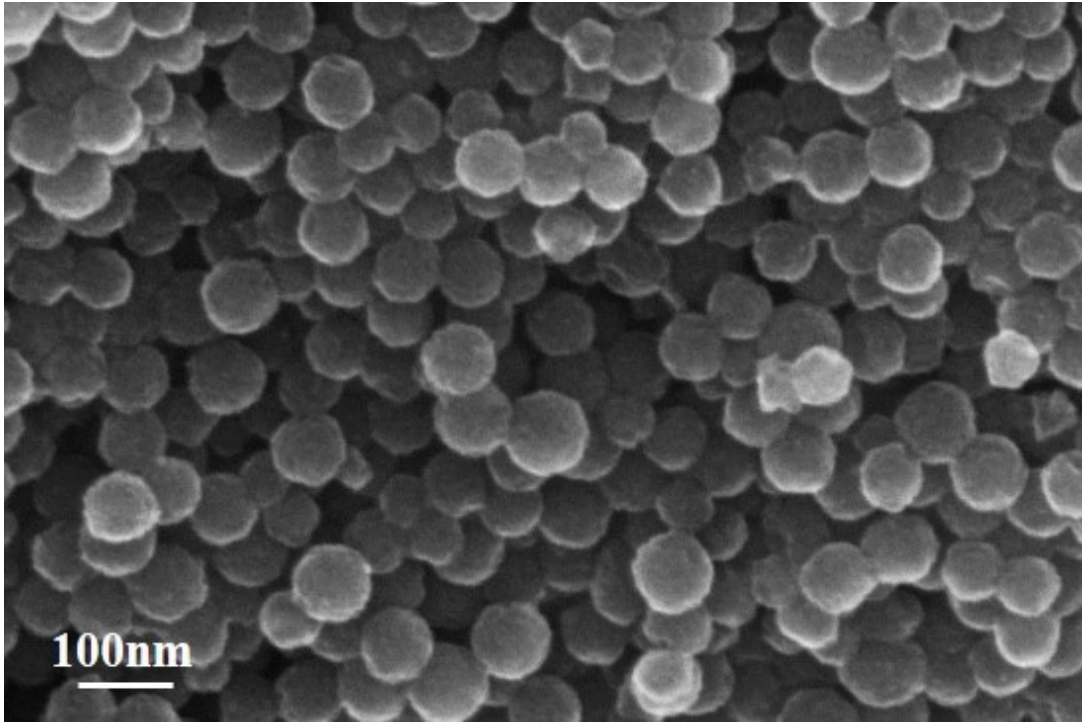

**Fig. S9** SEM images of  $(\text{Fe}_{0.16}\text{Co}_{0.84})\text{S}_2$ .

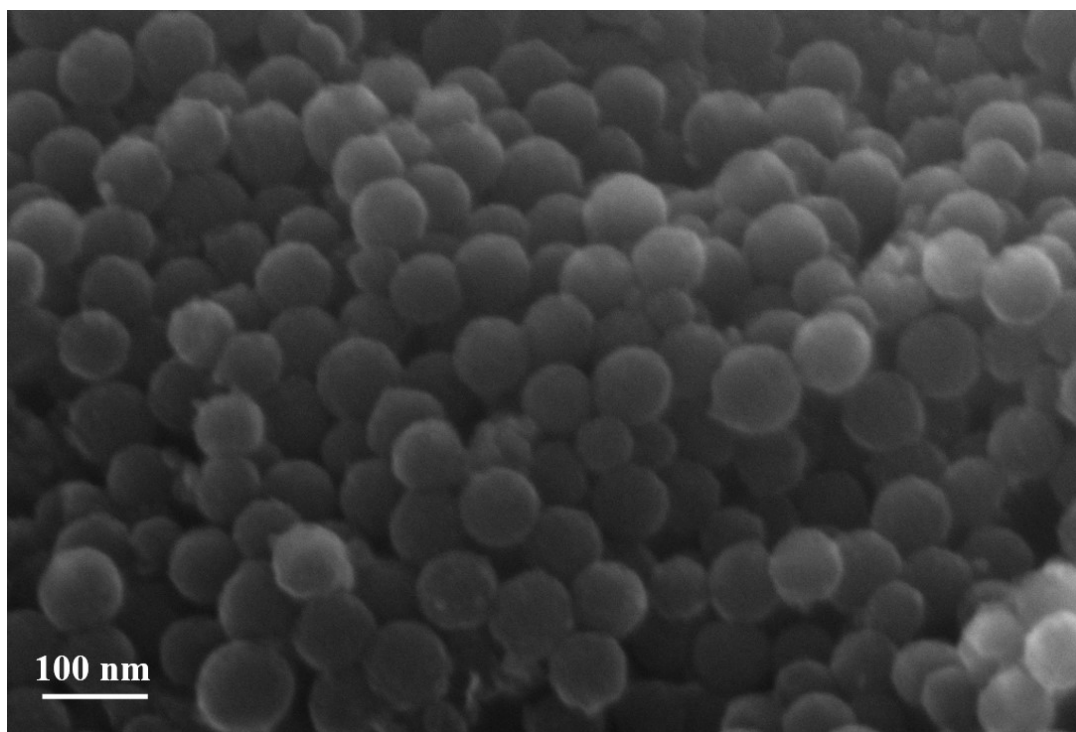

**Fig. S10** SEM images of FeS<sub>2</sub>.

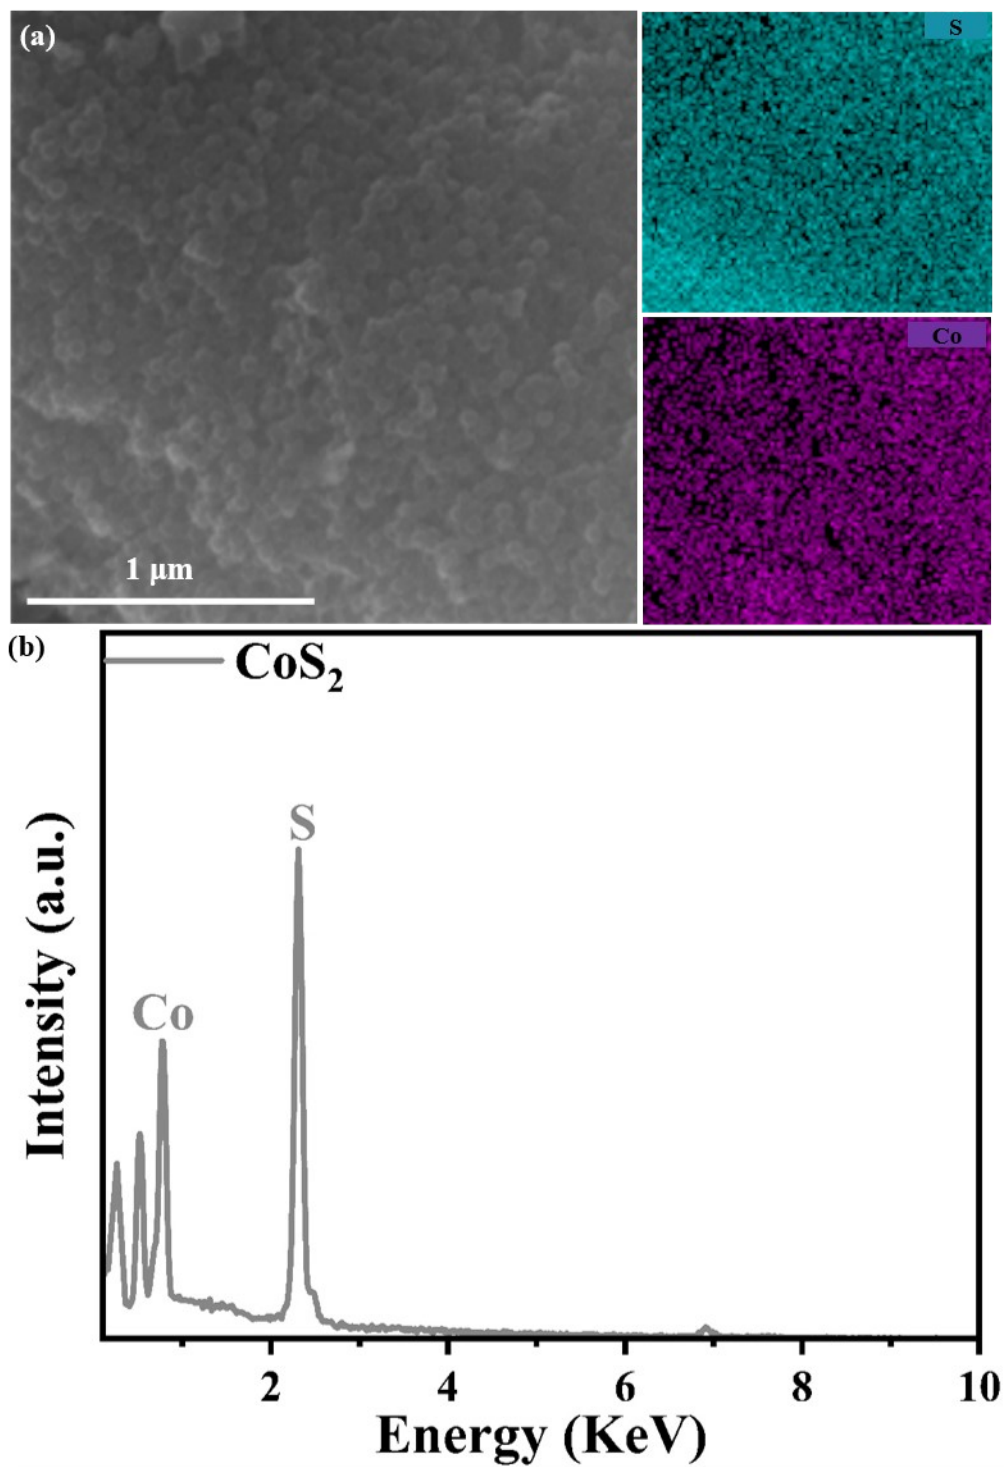

**Fig. S11** (a) SEM image and corresponding EDS element mapping images of  $\text{CoS}_2$ . (b) SEM-EDS spectrum of  $\text{CoS}_2$ .

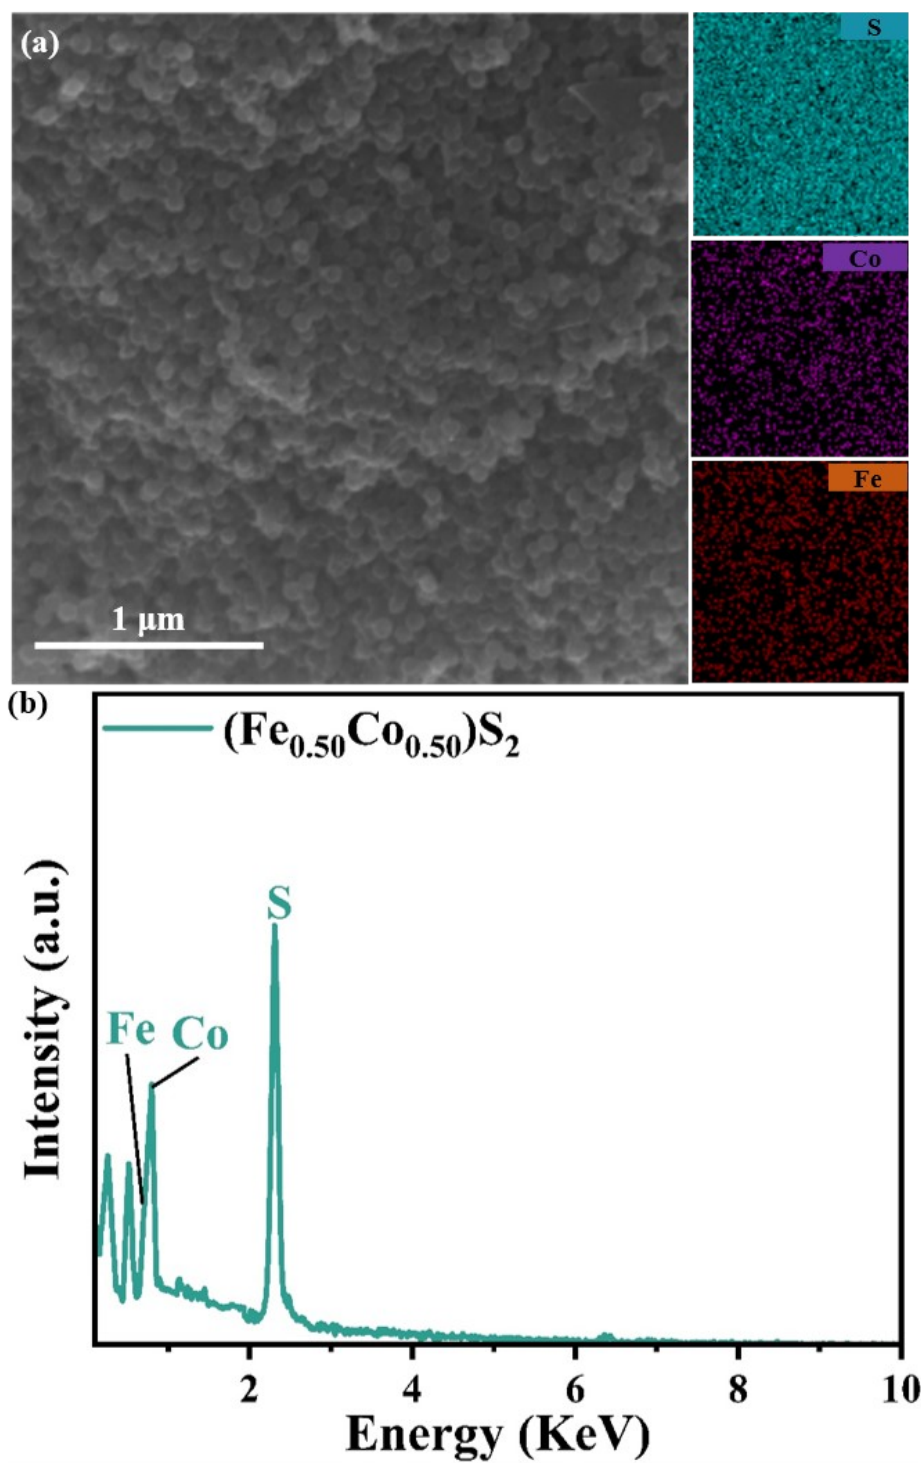

**Fig. S12** (a) SEM image and corresponding EDS element mapping images of  $(\text{Fe}_{0.50}\text{Co}_{0.50})\text{S}_2$ . (b) SEM-EDS spectrum of  $(\text{Fe}_{0.50}\text{Co}_{0.50})\text{S}_2$ .



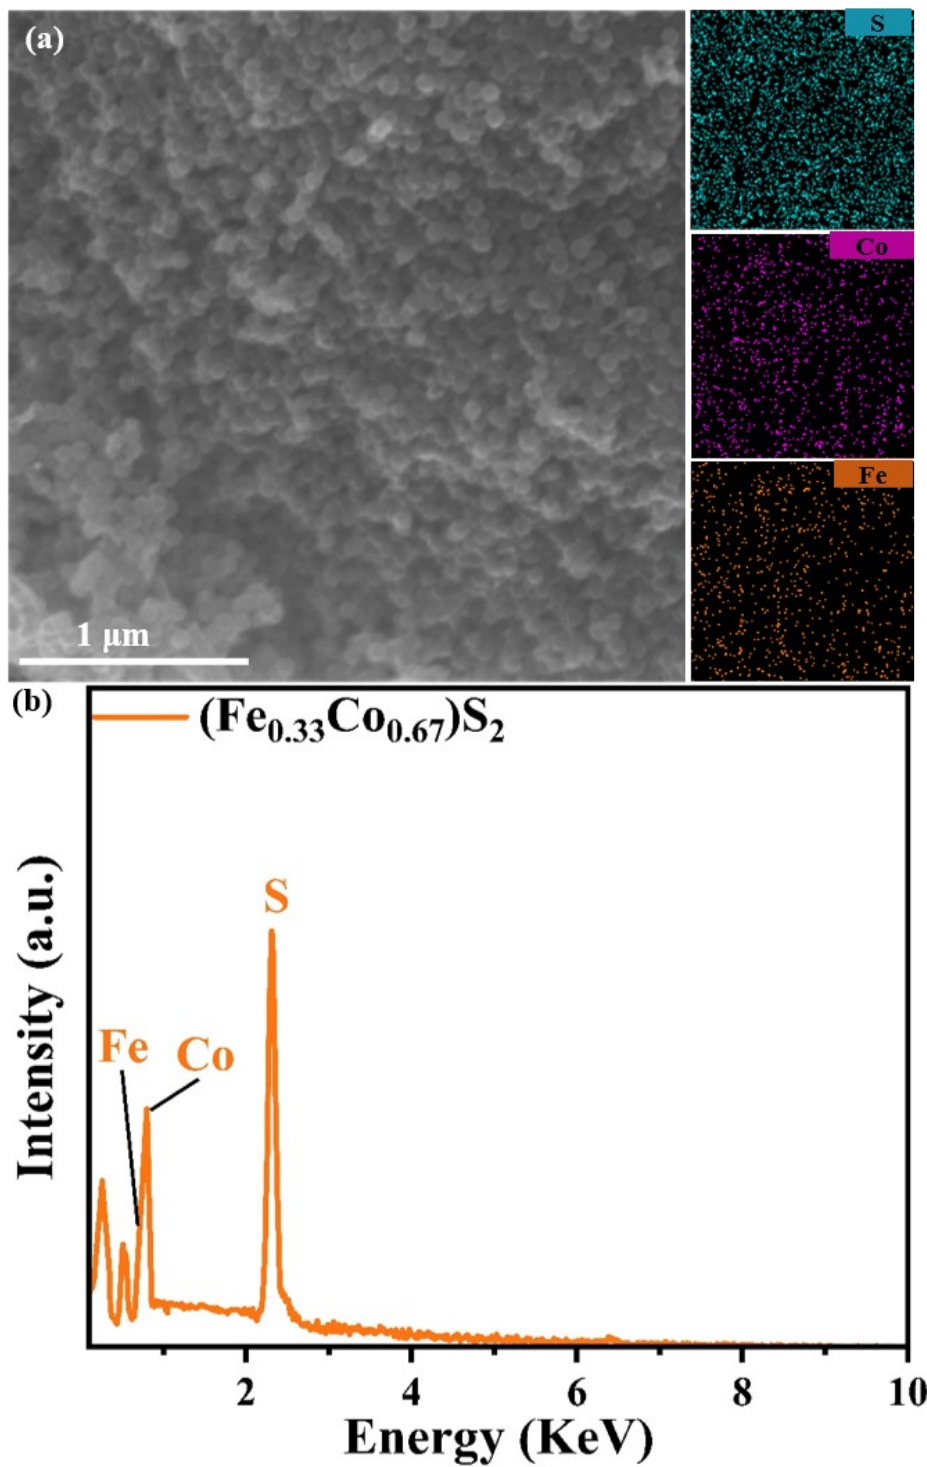

**Fig. S13** (a) SEM image and corresponding EDS element mapping images of  $(\text{Fe}_{0.33}\text{Co}_{0.67})\text{S}_2$ . (b) SEM-EDS spectrum of  $(\text{Fe}_{0.33}\text{Co}_{0.67})\text{S}_2$ .

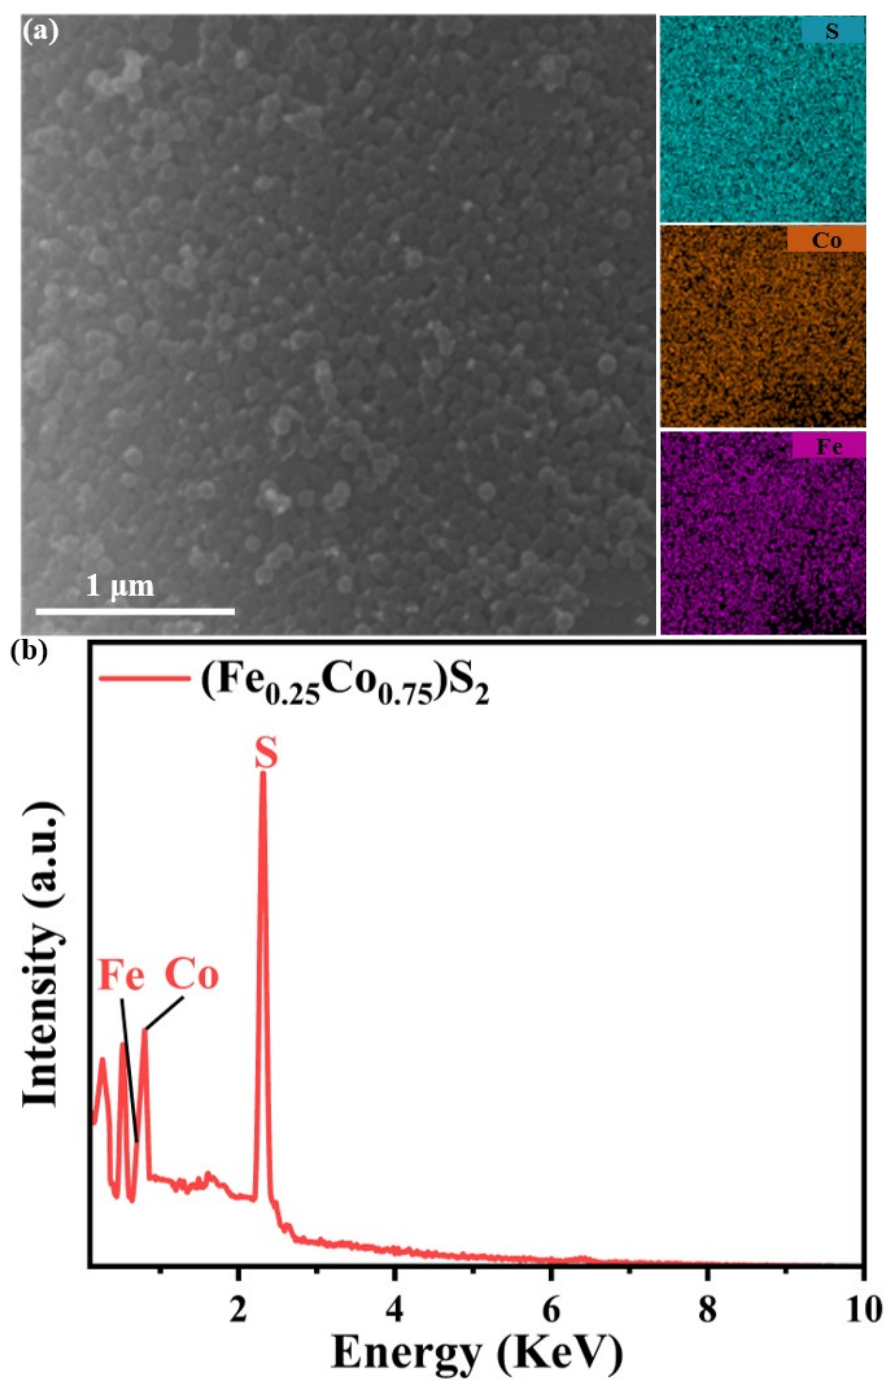

**Fig. S14** (a) SEM image and corresponding EDS element mapping images of  $(\text{Fe}_{0.25}\text{Co}_{0.75})\text{S}_2$ . (b) SEM-EDS spectrum of  $(\text{Fe}_{0.25}\text{Co}_{0.75})\text{S}_2$ .

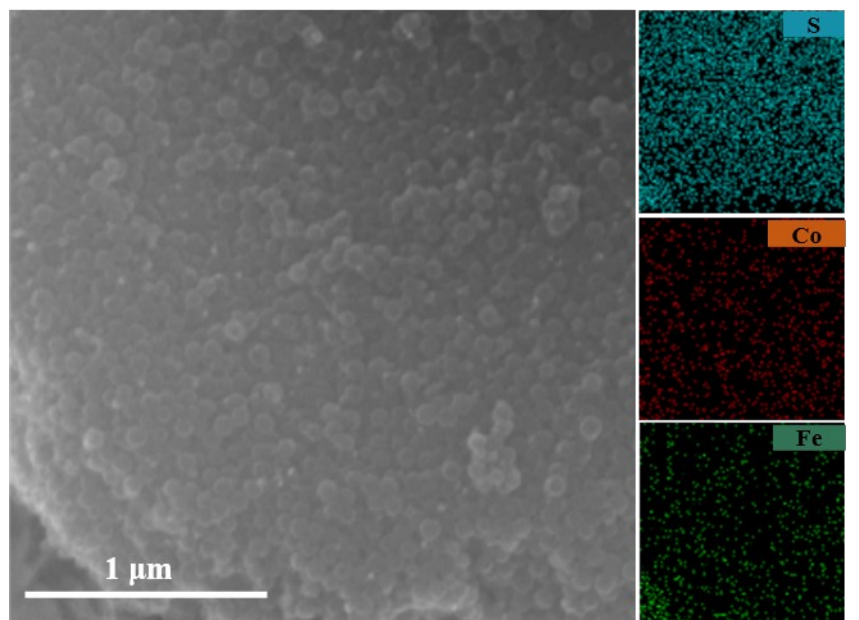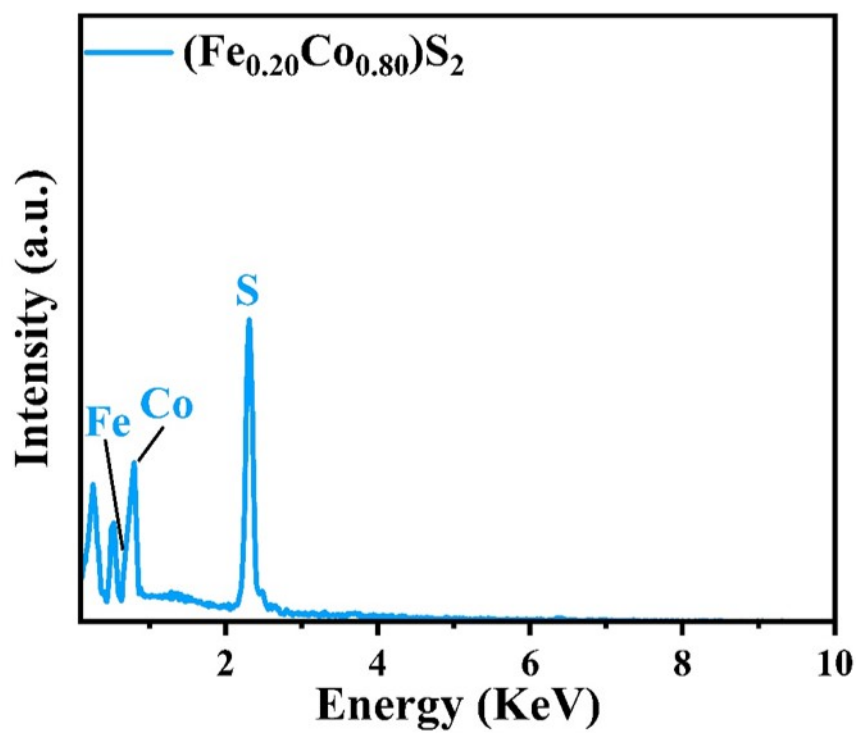

**Fig. S15** (a) SEM image and corresponding EDS element mapping images of  $(\text{Fe}_{0.20}\text{Co}_{0.80})\text{S}_2$ . (b) SEM-EDS spectrum of  $(\text{Fe}_{0.20}\text{Co}_{0.80})\text{S}_2$ .

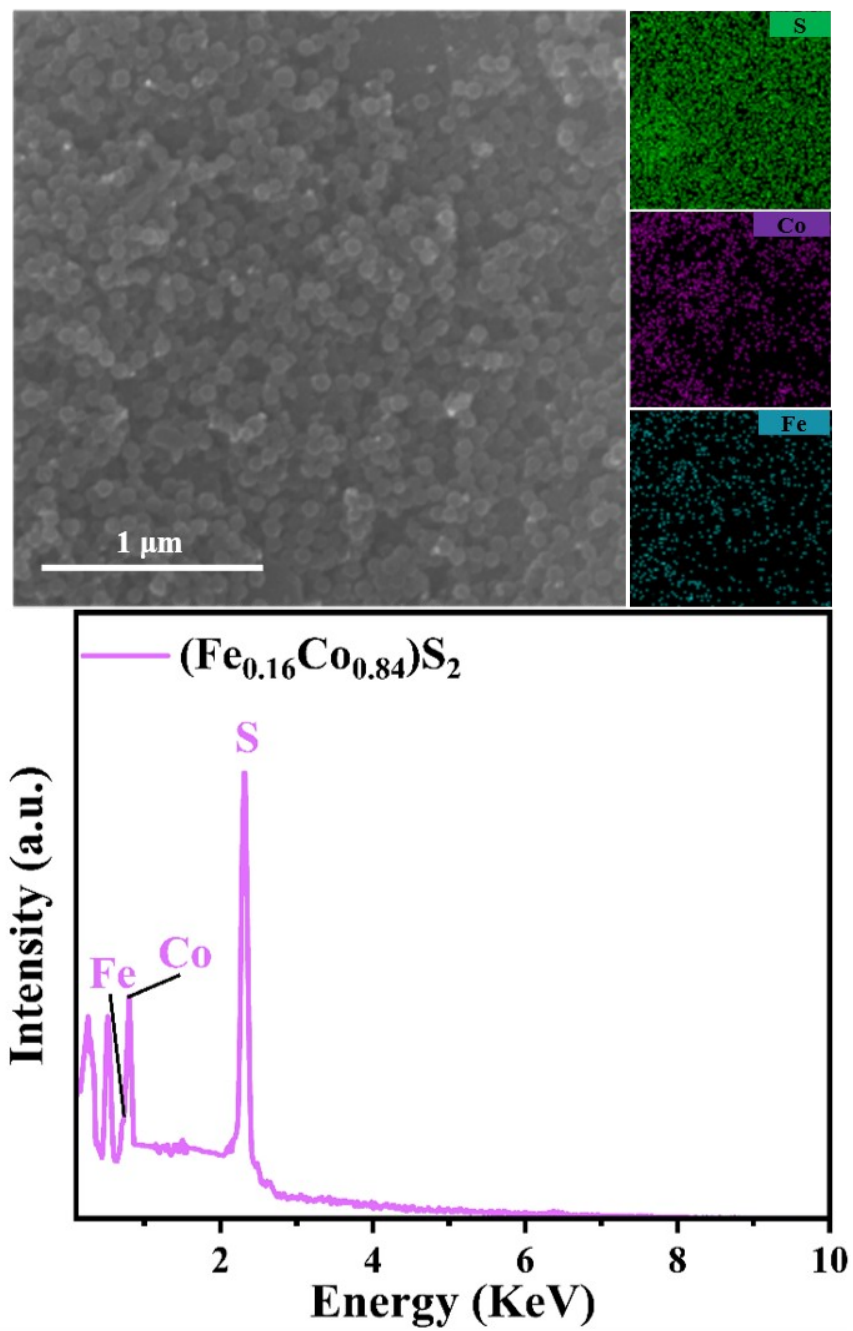

**Fig. S16** (a) SEM image and corresponding EDS element mapping images of  $(\text{Fe}_{0.16}\text{Co}_{0.84})\text{S}_2$ . (b) SEM-EDS spectrum of  $(\text{Fe}_{0.16}\text{Co}_{0.84})\text{S}_2$ .

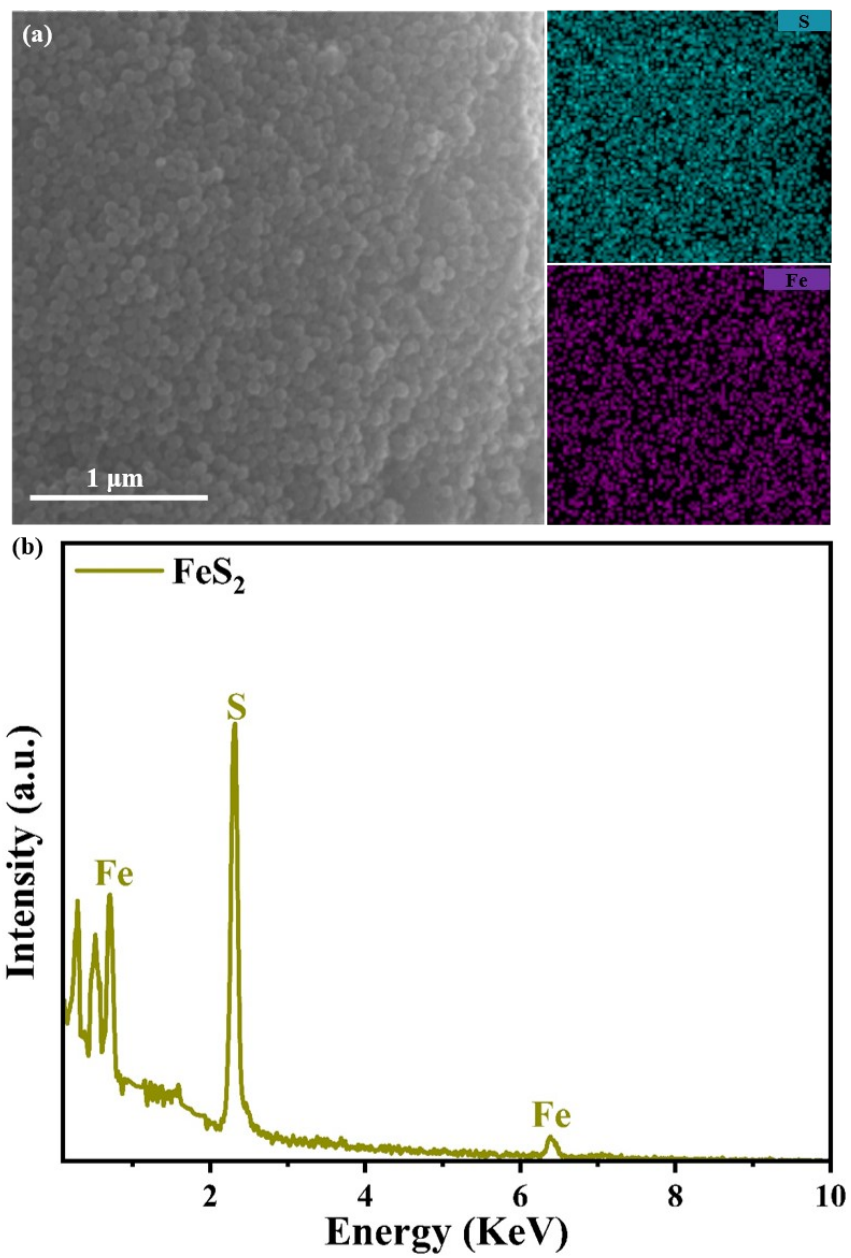

**Fig. S17** (a) SEM image and corresponding EDS element mapping images of FeS<sub>2</sub>. (b) SEM-EDS spectrum of FeS<sub>2</sub>.

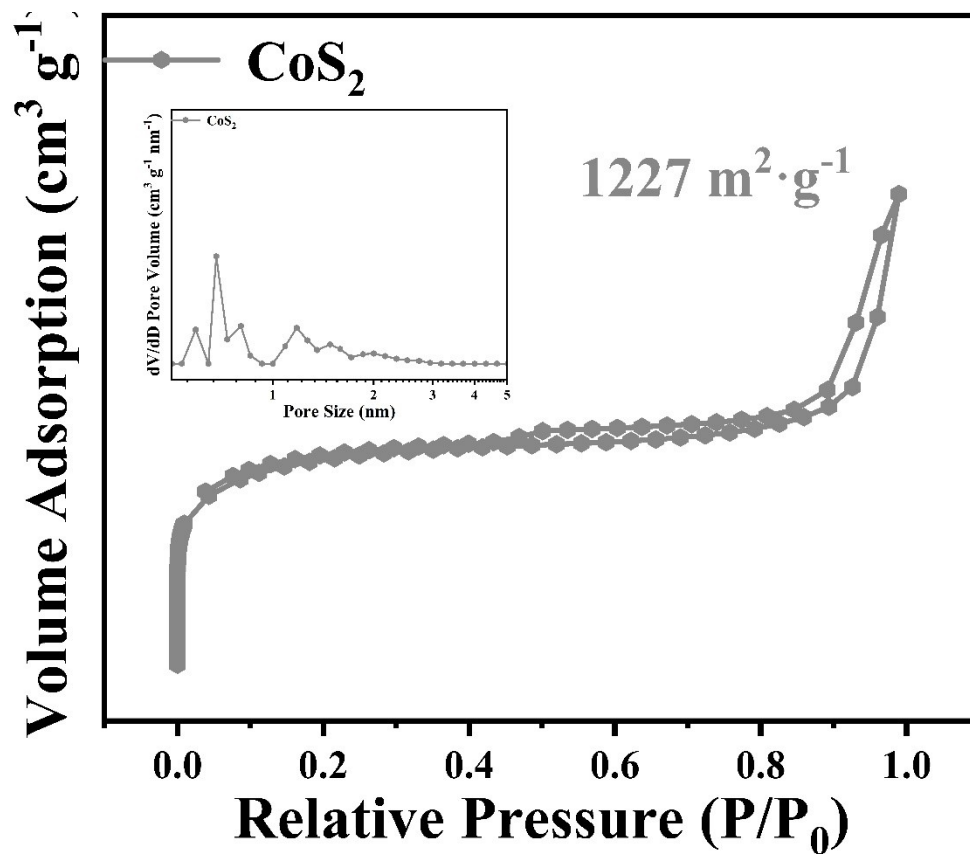

Fig. S18 N<sub>2</sub> adsorption–desorption isotherms and pore size distribution of CoS<sub>2</sub>.

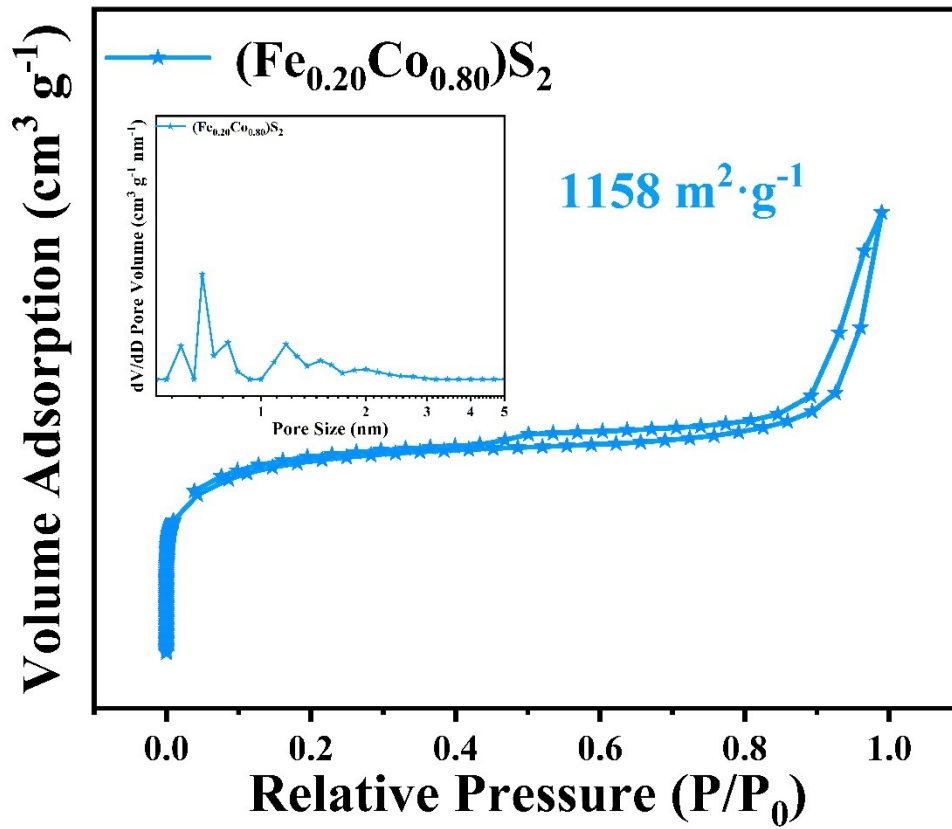

Fig. S19  $\text{N}_2$  adsorption–desorption isotherms and pore size distribution of  $(\text{Fe}_{0.20}\text{Co}_{0.80})\text{S}_2$ .

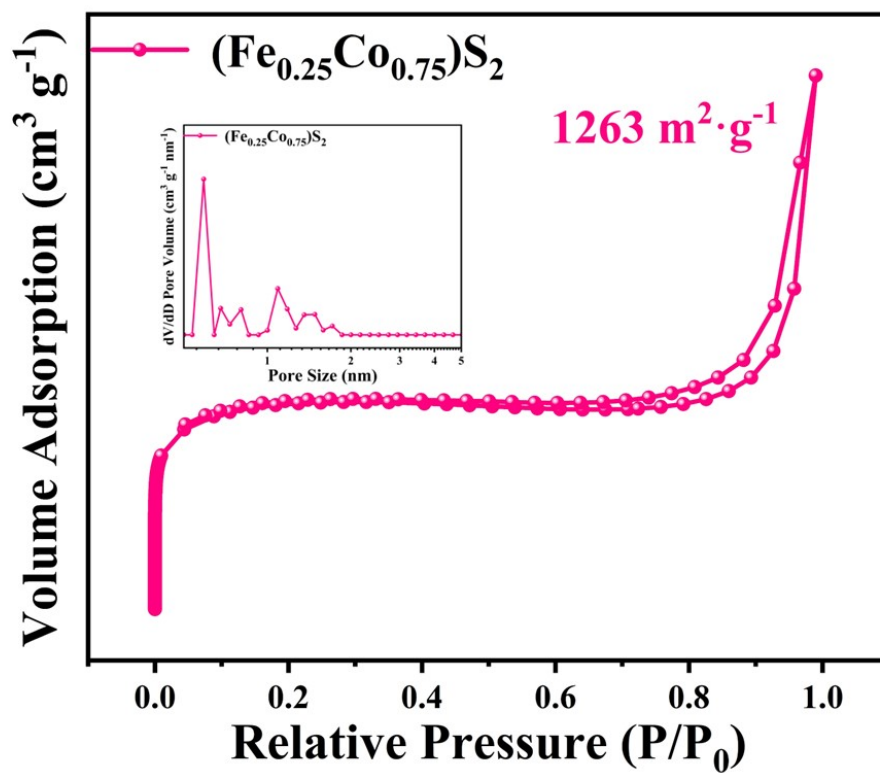

**Fig. S20**  $\text{N}_2$  adsorption–desorption isotherms and pore size distribution of  $(\text{Fe}_{0.25}\text{Co}_{0.75})\text{S}_2$ .



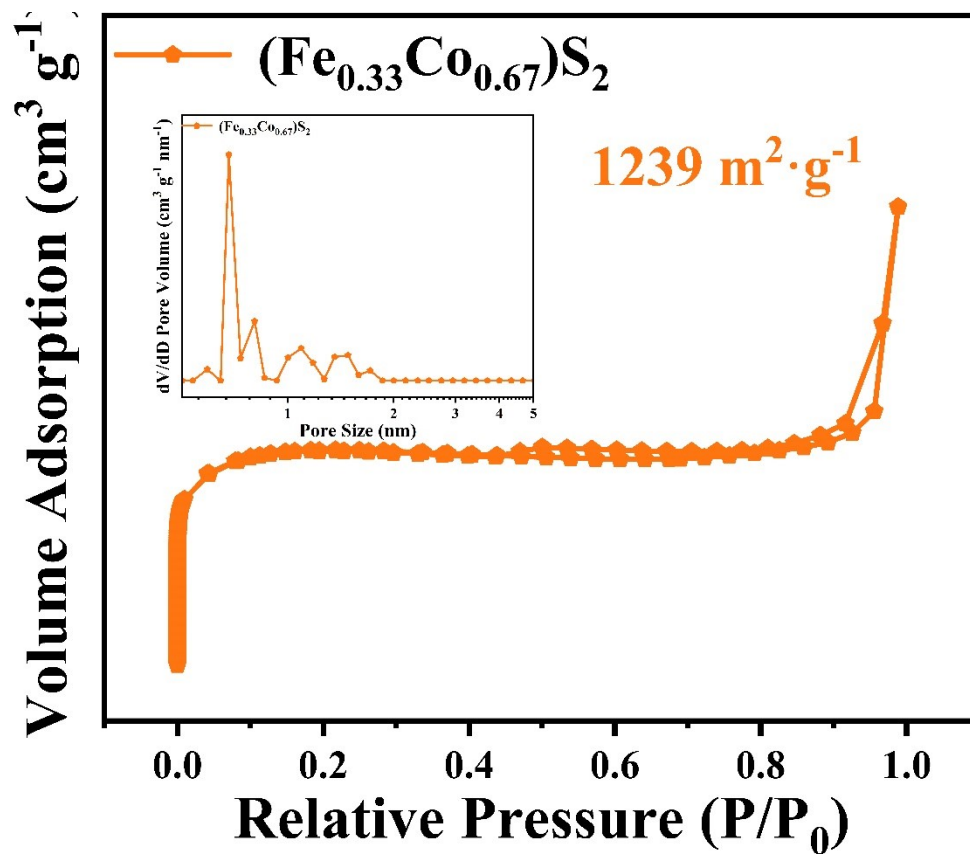

Fig. S21  $\text{N}_2$  adsorption–desorption isotherms and pore size distribution of  $(\text{Fe}_{0.33}\text{Co}_{0.67})\text{S}_2$ .

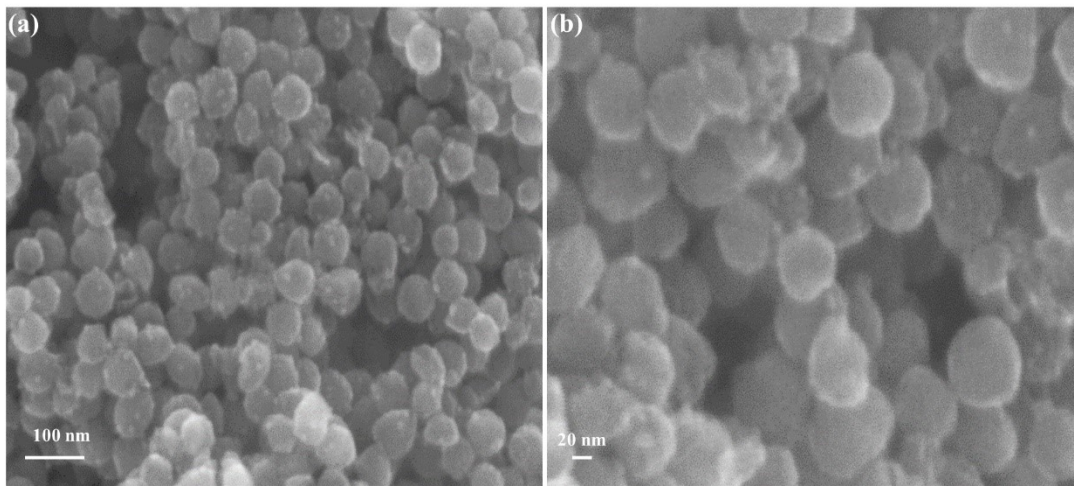

**Fig. S22** (a-b) SEM images of  $(\text{Fe}_{0.25}\text{Co}_{0.75})\text{S}_2\text{-S}$ .

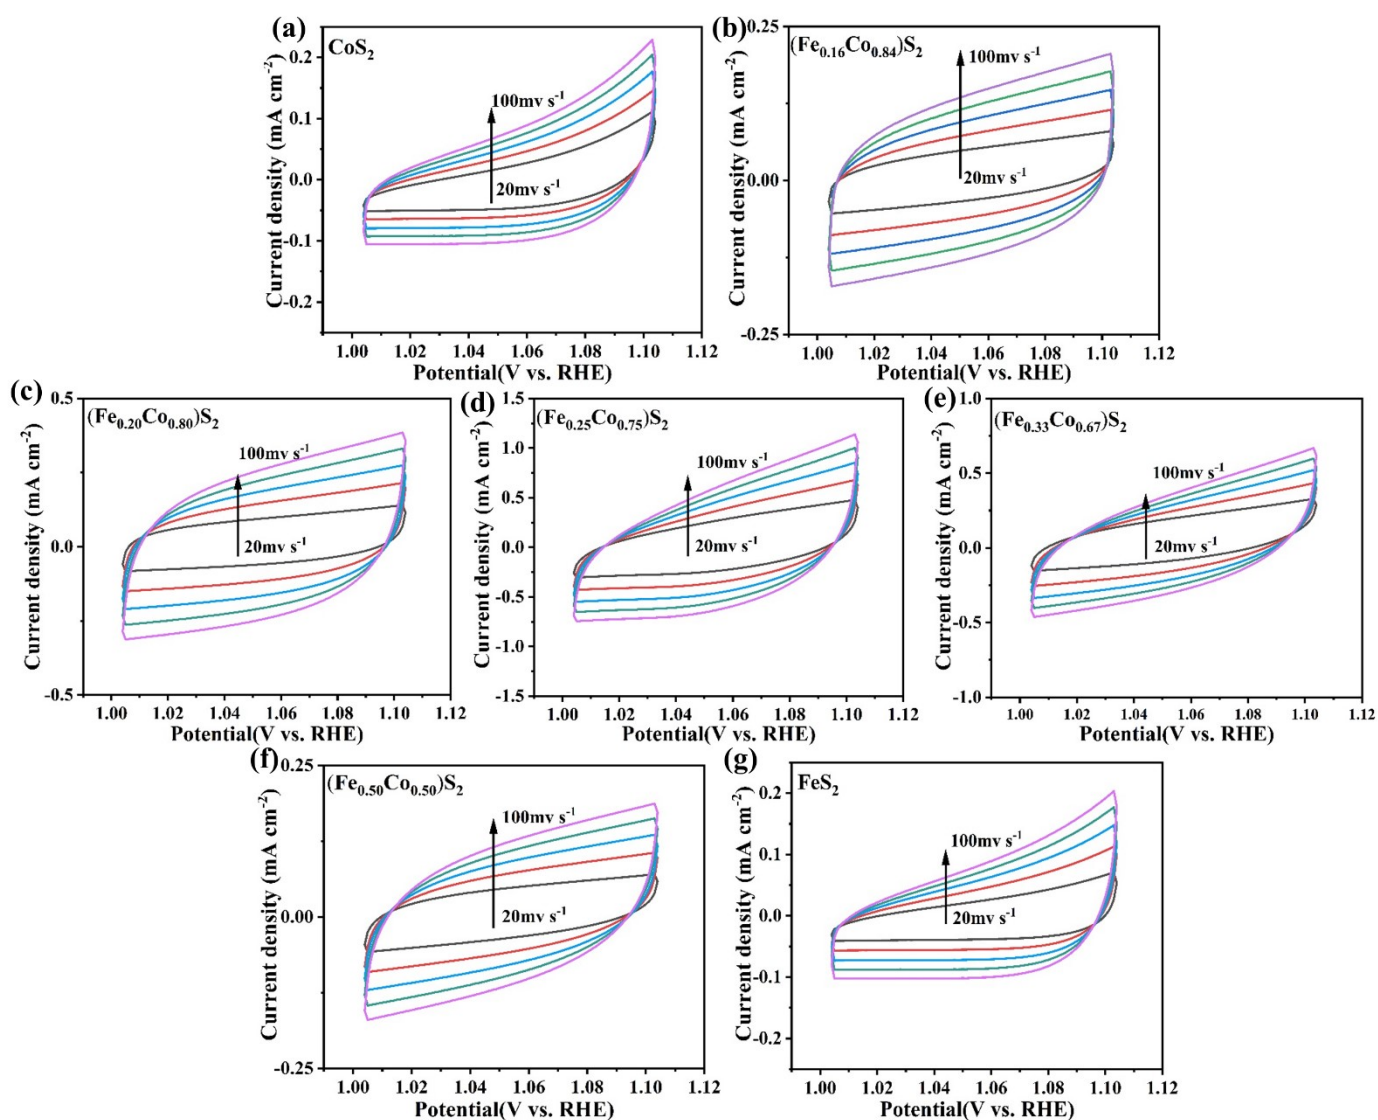

**Fig. S23** Cyclic voltammograms curves of (a-g)  $\text{CoS}_2$ ,  $(\text{Fe}_{0.50}\text{Co}_{0.50})\text{S}_2$ ,  $(\text{Fe}_{0.33}\text{Co}_{0.67})\text{S}_2$ ,  $(\text{Fe}_{0.25}\text{Co}_{0.75})\text{S}_2$ ,  $(\text{Fe}_{0.20}\text{Co}_{0.80})\text{S}_2$ ,  $(\text{Fe}_{0.16}\text{Co}_{0.84})\text{S}_2$  and  $\text{FeS}_2$  with the scan rates of 20, 40, 60, 80, and 100  $\text{mV S}^{-1}$ .

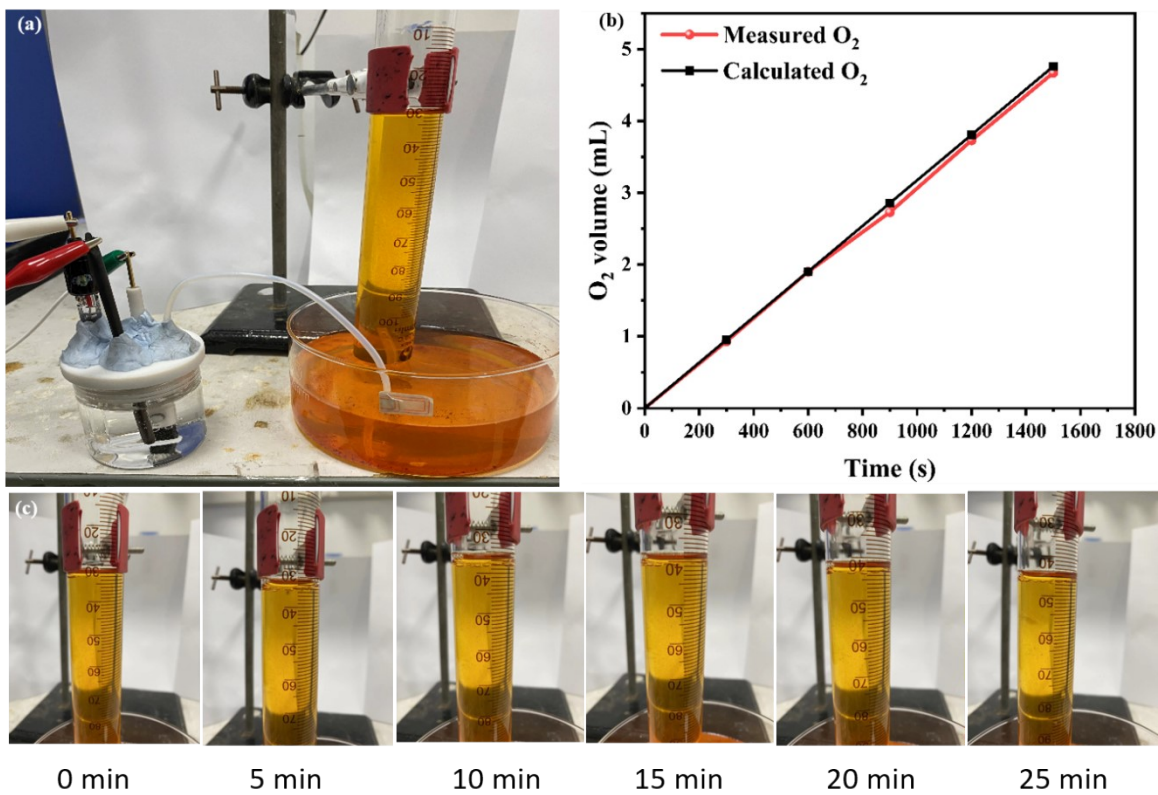

**Fig. S24** (a) Faraday efficiency test system. (b) Measured O<sub>2</sub> generation at 50 mA cm<sup>-2</sup> and the associated FE. (c) Oxygen generation at different test times.

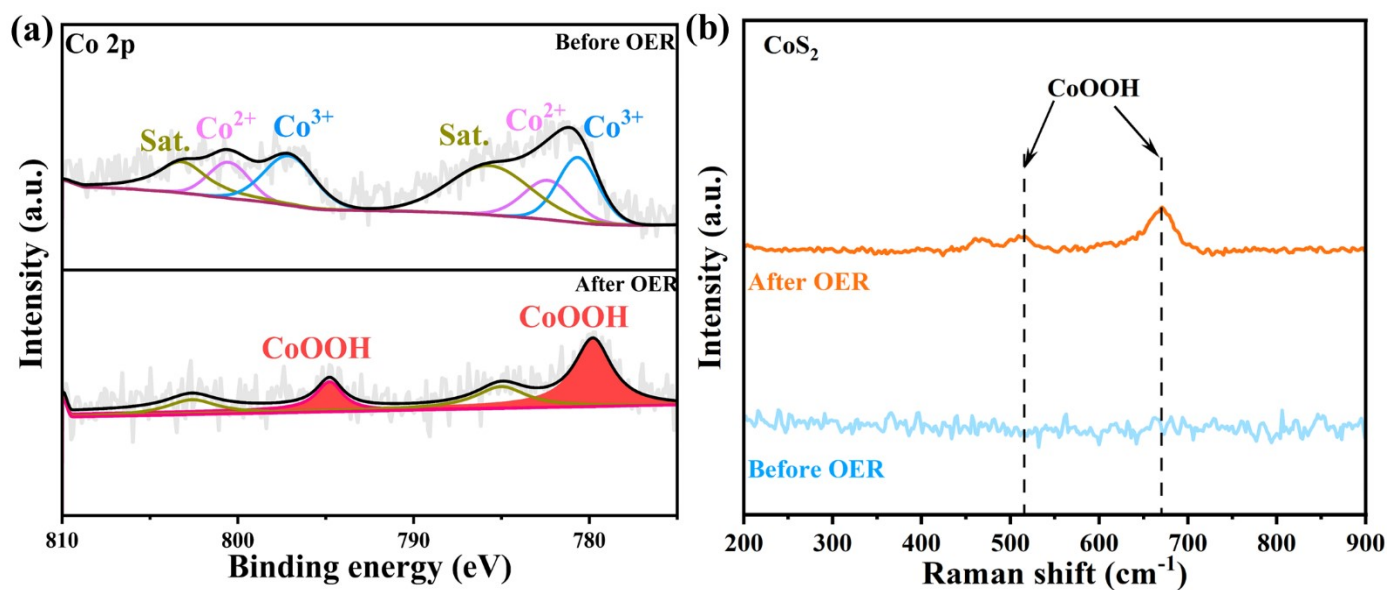

**Fig. S25** (a) XPS spectra of Co 2p for CoS<sub>2</sub> electrocatalyst before and after the OER reaction. (b) Raman spectra of CoS<sub>2</sub> before and after a 10 000 s OER stability test.

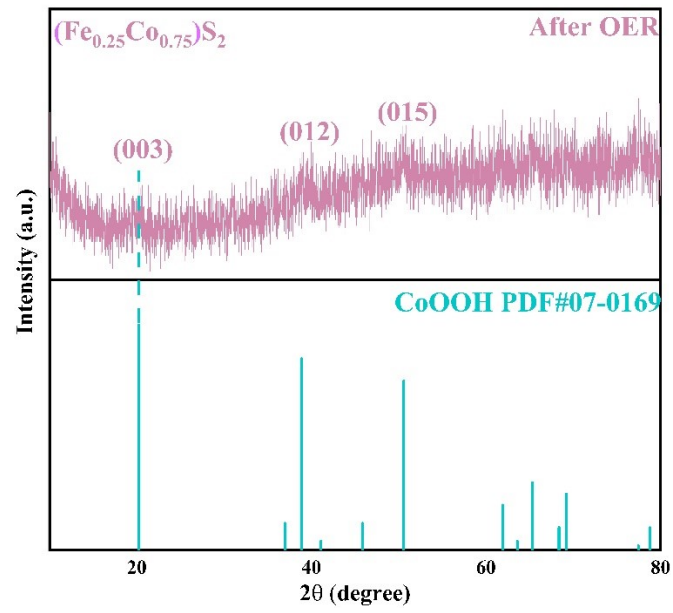

Fig. S26 XRD pattern of  $(\text{Fe}_{0.25}\text{Co}_{0.75})\text{S}_2$  after OER test.

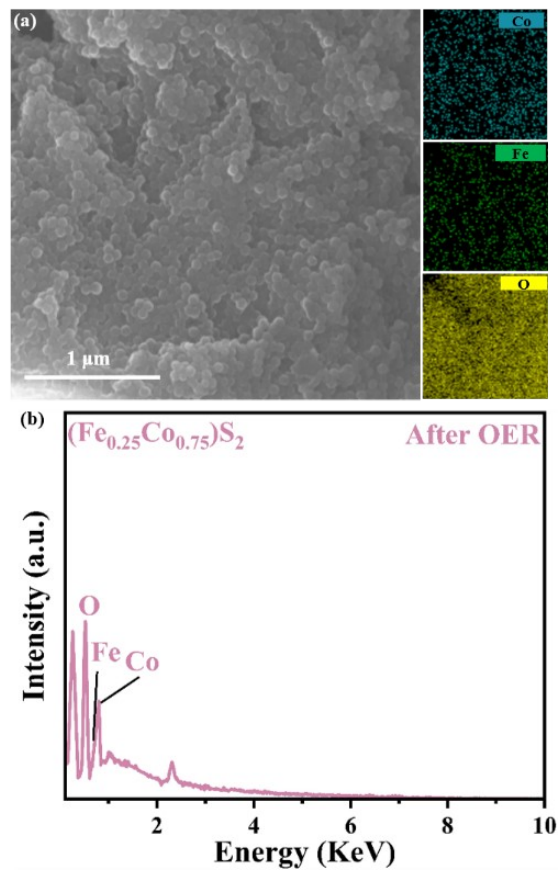

**Fig. S27** (a) SEM image and corresponding EDS element mapping images of  $(\text{Fe}_{0.25}\text{Co}_{0.75})\text{S}_2$  after OER test. (b) SEM-EDS spectrum of  $(\text{Fe}_{0.25}\text{Co}_{0.75})\text{S}_2$  after OER test.

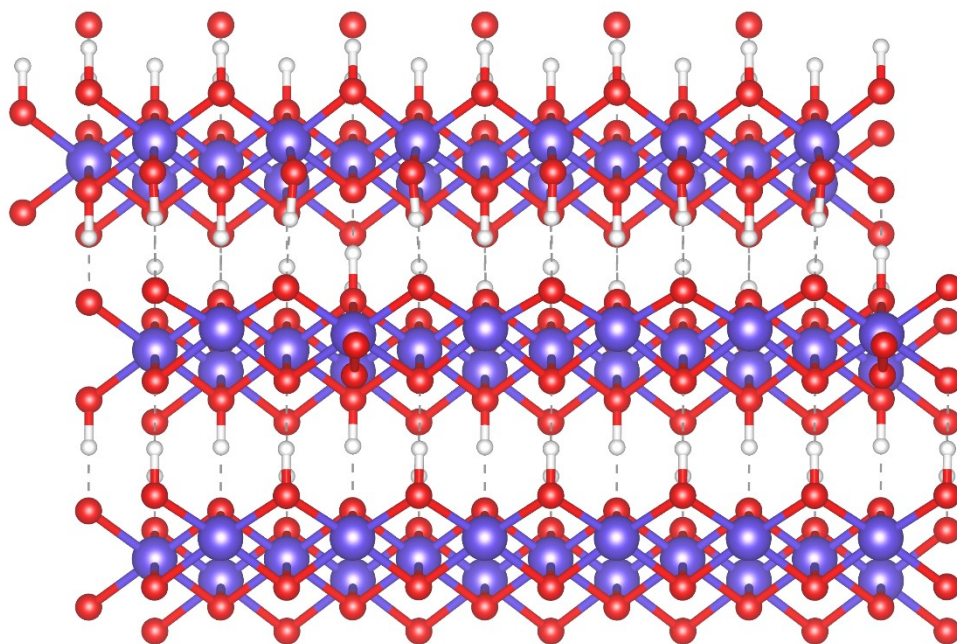

**Fig. S28** Model structure of CoOOH.



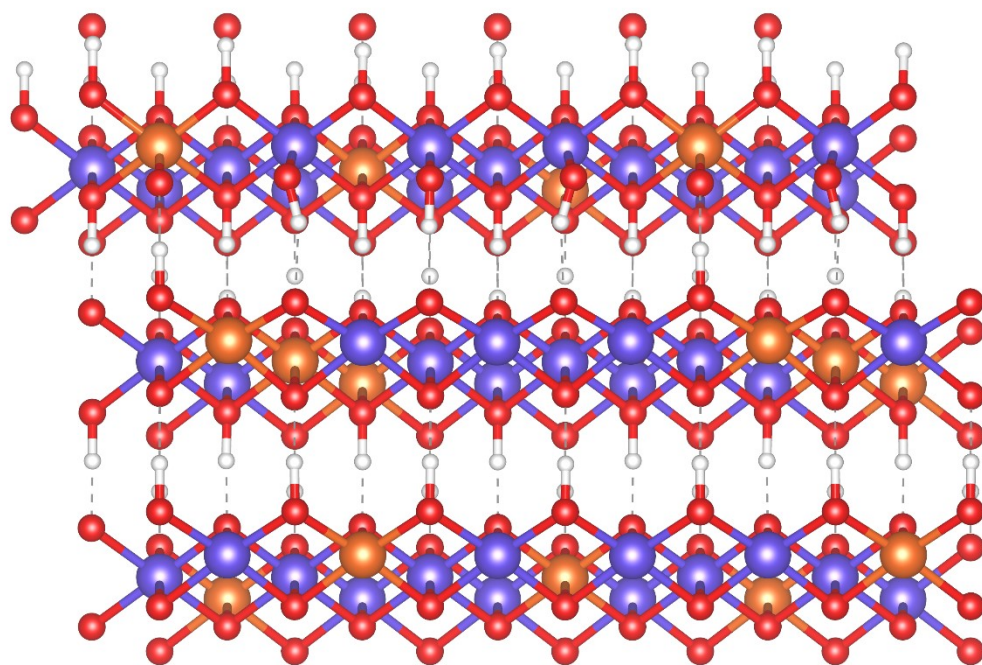

**Fig. S29** Model structure of (a)  $\text{Fe}_{0.25}\text{Co}_{0.75}\text{OOH}$ .

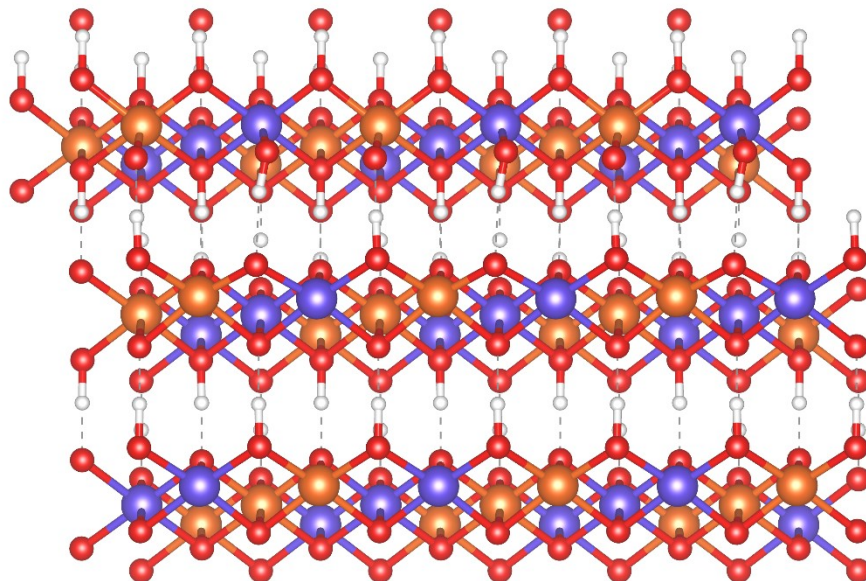

**Fig. S30** Model structure of (a) Fe<sub>0.5</sub>Co<sub>0.5</sub>OOH.

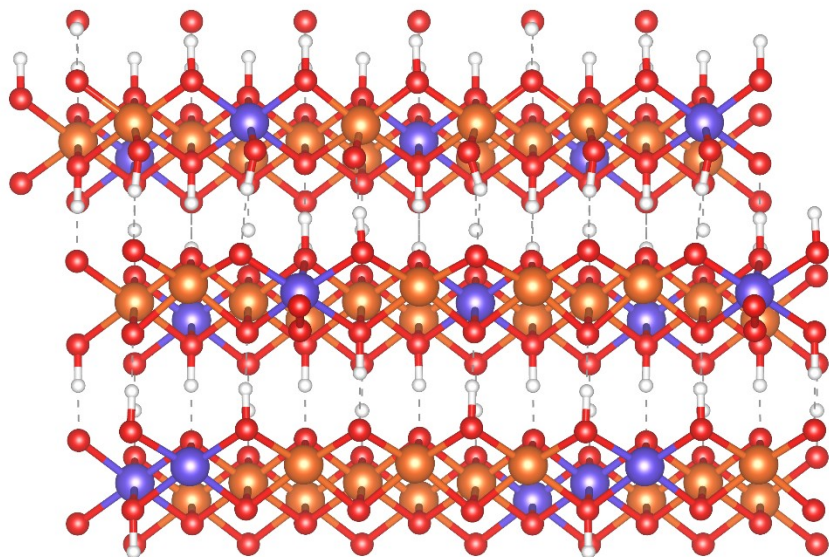

**Fig. S31** Model structure of (a)  $\text{Fe}_{0.75}\text{Co}_{0.25}\text{OOH}$ .

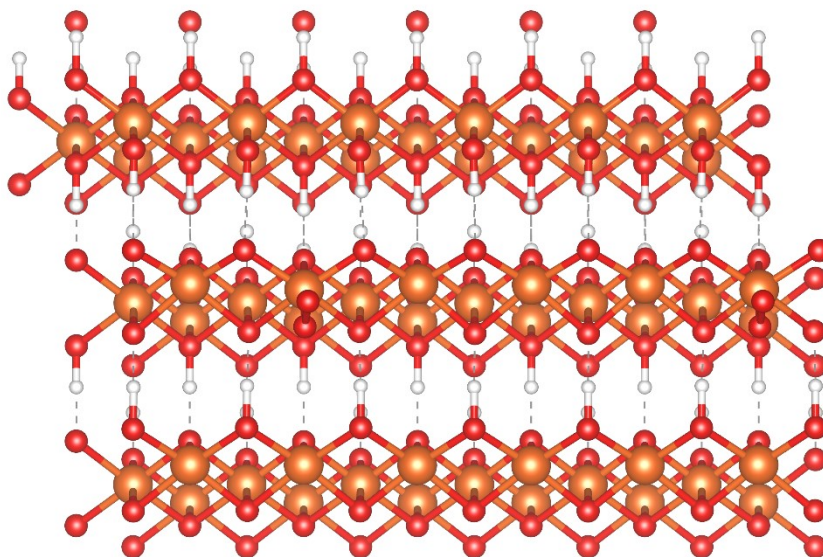

**Fig. S32** Model structure of (a) FeOOH.

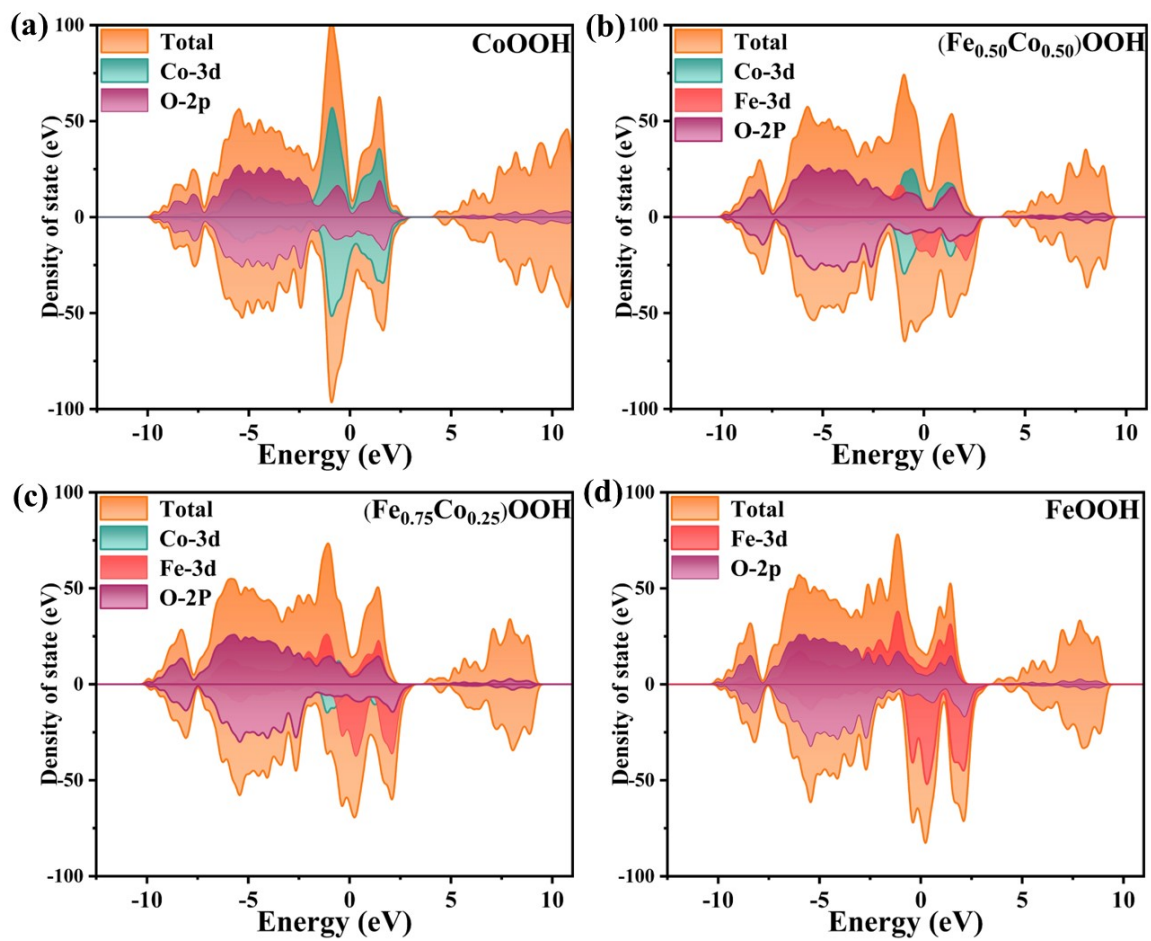

**Fig. S33** The DOS of (a) CoOOH, (b) Fe<sub>0.50</sub>Co<sub>0.50</sub>OOH, (c) Fe<sub>0.75</sub>Co<sub>0.25</sub>OOH and (d) FeOOH..

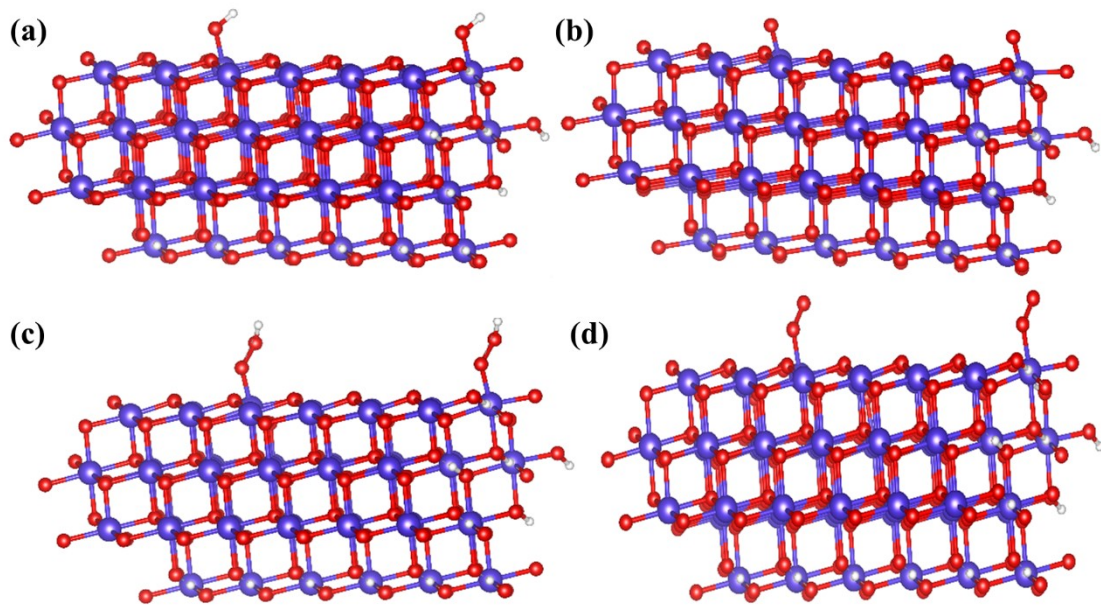

**Fig. S34** The adsorption configuration of oxygen-containing intermediates on CoOOH.

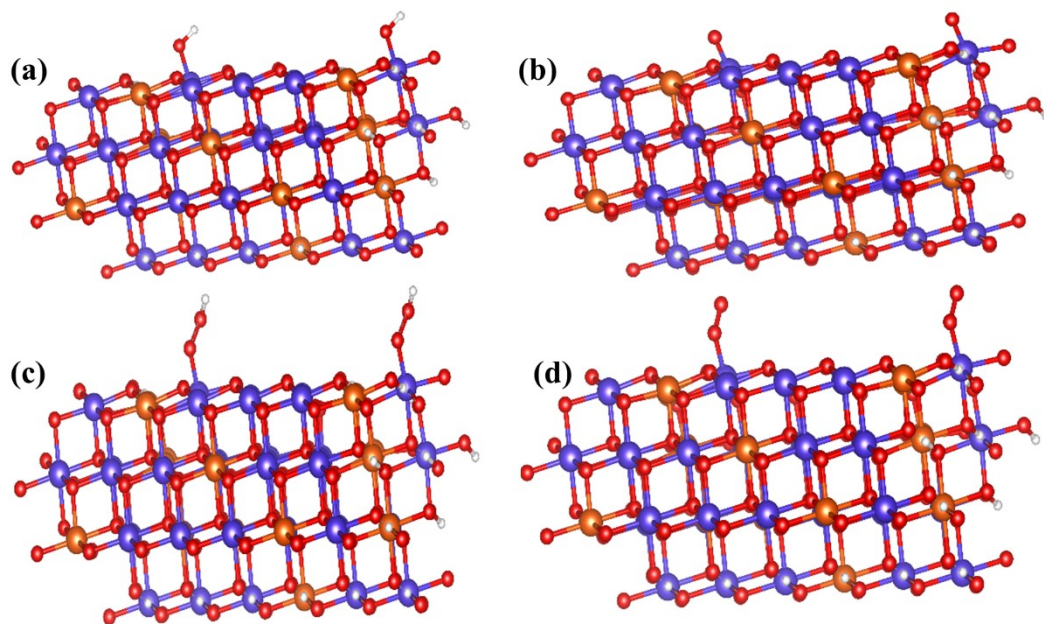

**Fig. S35** The adsorption configuration of oxygen-containing intermediates on Fe<sub>0.25</sub>Co<sub>0.75</sub>OOH.

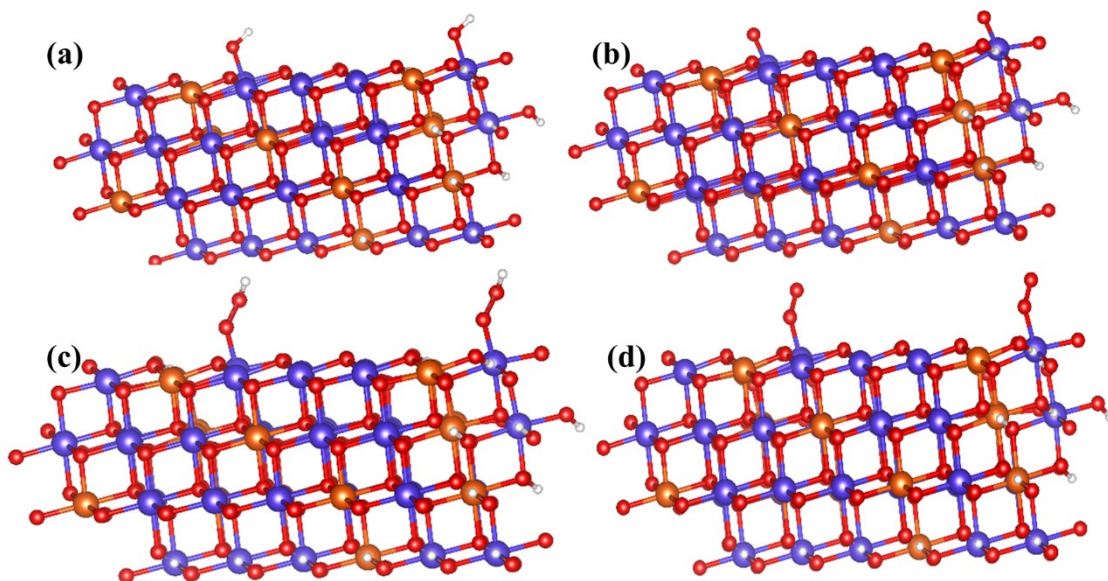

**Fig. S36** The adsorption configuration of oxygen-containing intermediates on  $\text{Fe}_{0.5}\text{Co}_{0.5}\text{OOH}$ .



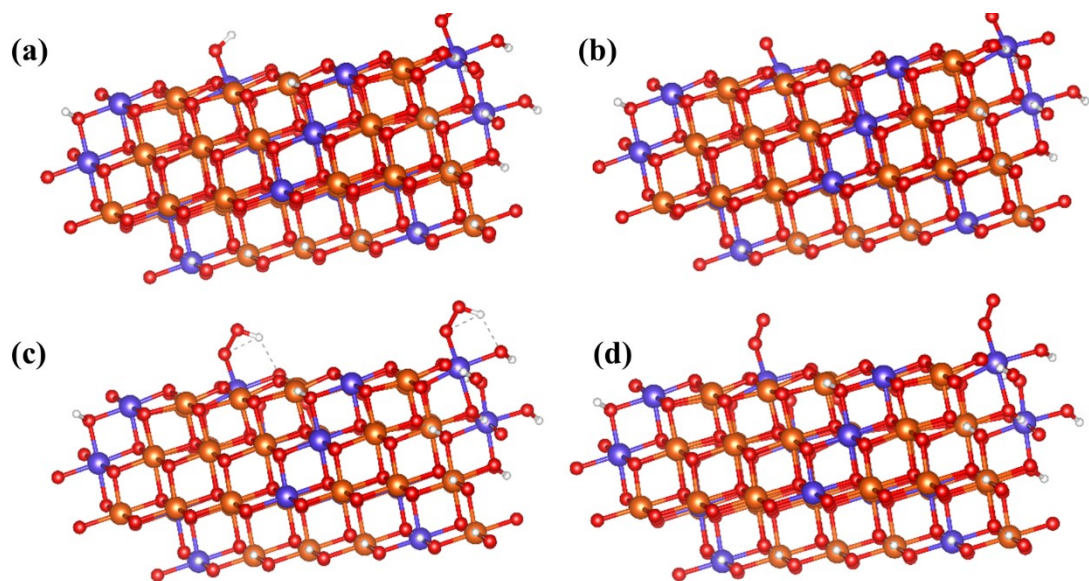

**Fig. S37** The adsorption configuration of oxygen-containing intermediates on  $\text{Fe}_{0.75}\text{Co}_{0.25}\text{OOH}$ .

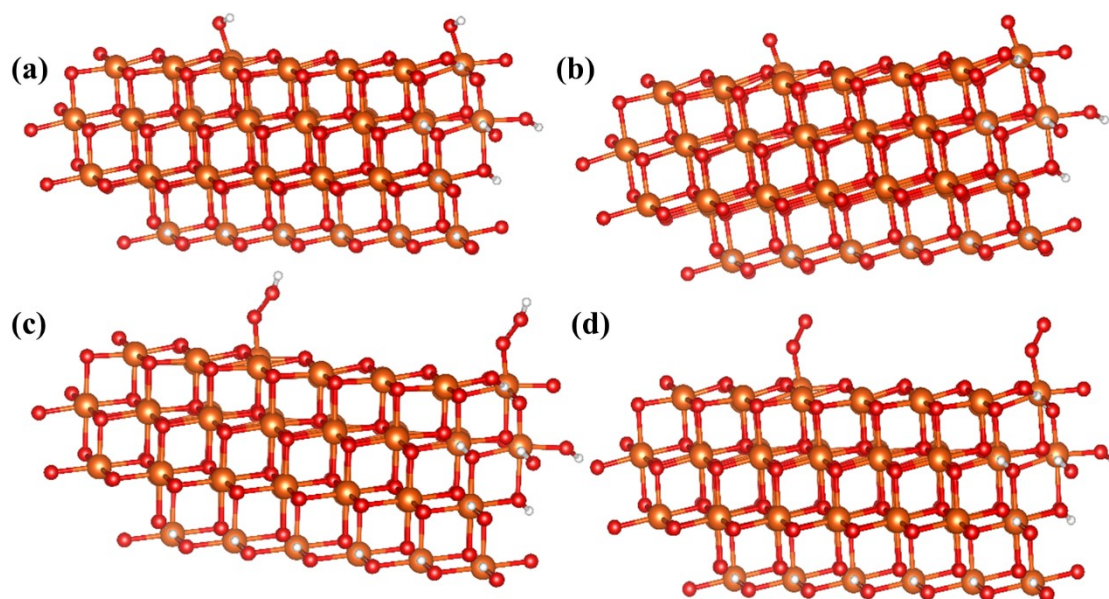

**Fig. S38** The adsorption configuration of oxygen-containing intermediates on FeOOH.

**Table S1.** atomic content of  $(\text{Fe}_x\text{Co}_{1-x})\text{S}_2$  samples by SEM-EDS.

| <b>Samples</b>                                 | <b>Co (At%)</b> | <b>Fe (At%)</b> | <b>S (At%)</b> |
|------------------------------------------------|-----------------|-----------------|----------------|
| $\text{CoS}_2$                                 | 32              | /               | 68             |
| $(\text{Fe}_{0.16}\text{Co}_{0.84})\text{S}_2$ | 27.5            | 5.3             | 67.2           |
| $(\text{Fe}_{0.20}\text{Co}_{0.80})\text{S}_2$ | 26.9            | 6.1             | 67.0           |
| $(\text{Fe}_{0.25}\text{Co}_{0.75})\text{S}_2$ | 25.2            | 9.0             | 65.8           |
| $(\text{Fe}_{0.33}\text{Co}_{0.67})\text{S}_2$ | 21.5            | 10.6            | 67.9           |
| $(\text{Fe}_{0.50}\text{Co}_{0.50})\text{S}_2$ | 16.8            | 15.9            | 67.3           |
| $\text{FeS}_2$                                 | /               | 33.0            | 67.0           |

**Table S2** XPS spectra of different catalysts with Co 2p.

| <b>Samples</b>                                         | <b>Co<sup>2+</sup>2p<sub>1/2</sub></b> | <b>Co<sup>3+</sup>2p<sub>1/2</sub></b> | <b>Co<sup>2+</sup>2p<sub>1/2</sub></b> | <b>Co<sup>3+</sup>2p<sub>1/2</sub></b> |
|--------------------------------------------------------|----------------------------------------|----------------------------------------|----------------------------------------|----------------------------------------|
| CoS <sub>2</sub>                                       | 780.77                                 | 783.20                                 | 797.08                                 | 800.51                                 |
| (Fe <sub>0.33</sub> Co <sub>0.67</sub> )S <sub>2</sub> | 781.83                                 | 783.90                                 | 798.43                                 | 802.44                                 |
| (Fe <sub>0.25</sub> Co <sub>0.75</sub> )S <sub>2</sub> | 781.69                                 | 783.79                                 | 798.21                                 | 802.06                                 |
| (Fe <sub>0.20</sub> Co <sub>0.80</sub> )S <sub>2</sub> | 781.46                                 | 783.27                                 | 798.05                                 | 800.57                                 |

**Table S3** Component ratio (at %) of  $\text{Co}^{3+}/\text{Co}^{2+}$  in sample  $(\text{Fe}_x\text{Co}_{1-x})\text{S}_2$  catalysts by XPS.

| <b>Samples</b>                                 | <b><math>\text{Co}^{3+}/\text{Co}^{2+}</math></b> |
|------------------------------------------------|---------------------------------------------------|
| $\text{CoS}_2$                                 | 1.53                                              |
| $(\text{Fe}_{0.33}\text{Co}_{0.67})\text{S}_2$ | 1.57                                              |
| $(\text{Fe}_{0.25}\text{Co}_{0.75})\text{S}_2$ | 1.66                                              |
| $(\text{Fe}_{0.20}\text{Co}_{0.80})\text{S}_2$ | 1.70                                              |

**Table S4** XPS spectra of different catalysts with Fe 2p.

| <b>Samples</b>                                         | <b>Fe<sup>2+</sup>2p<sub>1/2</sub></b> | <b>Fe<sup>3+</sup>2p<sub>1/2</sub></b> | <b>Fe<sup>2+</sup>2p<sub>3/2</sub></b> | <b>Fe<sup>3+</sup>2p<sub>3/2</sub></b> | <b>Fe-N<sub>x</sub> 2p<sub>1/2</sub></b> | <b>Fe-N<sub>x</sub> 2p<sub>3/2</sub></b> |
|--------------------------------------------------------|----------------------------------------|----------------------------------------|----------------------------------------|----------------------------------------|------------------------------------------|------------------------------------------|
| (Fe <sub>0.33</sub> Co <sub>0.67</sub> )S <sub>2</sub> | 712.63                                 | 716.11                                 | 724.58                                 | 726.61                                 | 709.67                                   | 722.29                                   |
| (Fe <sub>0.25</sub> Co <sub>0.75</sub> )S <sub>2</sub> | 712.71                                 | 716.26                                 | 725.08                                 | 727.05                                 | 709.71                                   | 722.40                                   |
| (Fe <sub>0.20</sub> Co <sub>0.80</sub> )S <sub>2</sub> | 712.79                                 | 716.54                                 | 725.18                                 | 727.87                                 | 709.83                                   | 722.54                                   |

**Table S5** Component ratio (at %) of N in sample (Fe<sub>x</sub>Co<sub>1-x</sub>)S<sub>2</sub> catalysts by XPS.

| <b>Different N Components (at%)</b>                    |                         |              |                   |                         |                        |
|--------------------------------------------------------|-------------------------|--------------|-------------------|-------------------------|------------------------|
| <b>Samples</b>                                         | <b>Pyridinic-<br/>N</b> | <b>Fe-Nx</b> | <b>Pyrrolic-N</b> | <b>Graphitic-<br/>N</b> | <b>Oxidized-<br/>N</b> |
| (Fe <sub>0.33</sub> Co <sub>0.67</sub> )S <sub>2</sub> | 5.15%                   | 8.80%        | 25.40%            | 42.87%                  | 17.78%                 |
| (Fe <sub>0.25</sub> Co <sub>0.75</sub> )S <sub>2</sub> | 7.05%                   | 4.79%        | 37.55%            | 33.69%                  | 16.92%                 |
| (Fe <sub>0.20</sub> Co <sub>0.80</sub> )S <sub>2</sub> | 2.66%                   | 4.44%        | 36.69%            | 39.51%                  | 16.70%                 |

**Table S6** Comparison of OER activity of the reported electrocatalyst.

| Ref              | Catalyst                                                   | Overpotential<br>at 10 mA cm <sup>-2</sup><br>(mV) | Tafel slope<br>(mV·dec <sup>-1</sup> ) | Electrolyte          |
|------------------|------------------------------------------------------------|----------------------------------------------------|----------------------------------------|----------------------|
| <b>This work</b> | <b>(Fe<sub>0.25</sub>Co<sub>0.75</sub>)S<sub>2</sub></b>   | <b>274</b>                                         | <b>29.6</b>                            | <b>1.0 M<br/>KOH</b> |
| 1                | CoS <sub>2</sub>                                           | 300                                                | 81                                     | 1.0 M KOH            |
| 2                | CoS <sub>2</sub> /Cu <sub>2</sub> S-NF                     | 348                                                | 92                                     | 1.0 M KOH            |
| 3                | Co <sub>2</sub> O <sub>4</sub> @CoS/NF                     | 290                                                | 1.61                                   | 1.0 M KOH            |
| 4                | Fc-Co <sub>x</sub> S <sub>y</sub>                          | 304                                                | 54.2                                   | 1.0 M KOH            |
| 5                | meso-FeMoS <sub>2</sub> /CoMo <sub>2</sub> S <sub>4</sub>  | 290                                                | 65                                     | 1.0 M KOH            |
| 6                | Co <sub>9</sub> S <sub>8</sub> /N, P-APC                   | 363                                                | 94.7                                   | 1.0 M KOH            |
| 7                | Co <sub>9</sub> S <sub>8</sub> @TDC-900                    | 330                                                | 86                                     | 1.0 M KOH            |
| 8                | Co <sub>x</sub> Ni <sub>1-x</sub> S <sub>2</sub> (CNS)/rGO | 330                                                | 46                                     | 1.0 M KOH            |
| 9                | MoS <sub>2</sub> /NiCoS                                    | 290                                                | 77                                     | 1.0 M KOH            |
| 10               | Co <sub>3</sub> S <sub>4</sub> @MoS <sub>2</sub>           | 280                                                | 43                                     | 1.0 M KOH            |



**Table S7** Summary the fitting parameters of the electrochemical impedance spectra.

| Catalyst                  | $R_s$ | $R_{ct}$ |
|---------------------------|-------|----------|
| $(Co_{0.50}Fe_{0.50})S_2$ | 1.96  | 25.22    |
| $(Co_{0.67}Fe_{0.33})S_2$ | 2.09  | 11.34    |
| $(Co_{0.25}Fe_{0.75})S_2$ | 1.98  | 8.95     |
| $(Co_{0.80}Fe_{0.20})S_2$ | 2.07  | 13.13    |
| $(Co_{0.84}Fe_{0.16})S_2$ | 1.93  | 24.13    |
| $CoS_2$                   | 2.09  | 38.77    |
| $FeS_2$                   | 2.04  | 88.08    |

**Table S8.** Atomic content of  $(\text{Fe}_{0.25}\text{Co}_{0.75})\text{S}_2$  after OER stability test by SEM-EDS.

| <b>Samples</b>                                 | <b>Co (At%)</b> | <b>Fe (At%)</b> | <b>O (At%)</b> |
|------------------------------------------------|-----------------|-----------------|----------------|
| $(\text{Fe}_{0.25}\text{Co}_{0.75})\text{OOH}$ | 25.2            | 9.0             | 65.8           |

## References

- 1 Y. Kang, Y. He, D. Pohl, B. Rellinghaus, D. Chen, M. Schmidt, V. Suss, Q. Mu, F. Li, Q. Yang, H. Chen, Y. Ma, G. Auffermann, G. Li and C. Felser, Identification of interface structure for a topological CoS<sub>2</sub> single crystal in oxygen evolution reaction with high intrinsic reactivity, *ACS Appl. Mater. Interfaces*, 2022, **14**, 19324-19331.
- 2 W. Li, L. Wu, X. Wu, C. Shi, Y. Li, L. Zhang, H. Mi, Q. Zhang, C. He and X. Ren, Regulation and mechanism study of the CoS<sub>2</sub>/Cu<sub>2</sub>S-NF heterojunction as highly-efficient bifunctional electrocatalyst for oxygen reactions, *Appl. Catal. B: Environ.*, 2022, **303**, 120849.
- 3 S. Adhikari, Y. Kwon and D.-H. Kim, Three-dimensional core-shell structured NiCo<sub>2</sub>O<sub>4</sub>@CoS/Ni-Foam electrocatalyst for oxygen evolution reaction and electrocatalytic oxidation of urea, *Chem. Eng. J.*, 2020, **402**, 126192.
- 4 P. Thangasamy, S. Oh, S. Nam, H. Randriamahazaka and I. K. Oh, Ferrocene-incorporated cobalt sulfide nanoarchitecture for superior oxygen evolution reaction, *Small*, 2020, **16**, 2001665.
- 5 Y. Guo, J. Tang, J. Henzie, B. Jiang, W. Xia, T. Chen, Y. Bando, Y.-M. Kang, M. S. A. Hossain, Y. Sugahara and Y. Yamauchi, Mesoporous Iron-doped MoS<sub>2</sub>/CoMo<sub>2</sub>S<sub>4</sub> Heterostructures through Organic-Metal Cooperative Interactions on Spherical Micelles for Electrochemical Water Splitting, *ACS Nano*, 2020, **14**, 4141-4152.
- 6 X. Hu, Y. Chen, M. Zhang, G. Fu, D. Sun, J.-M. Lee and Y. Tang, Alveolate porous carbon aerogels supported Co<sub>9</sub>S<sub>8</sub> derived from a novel hybrid hydrogel for bifunctional oxygen electrocatalysis, *Carbon*, 2019, **144**, 557-566.
- 7 J.-Y. Zhao, R. Wang, S. Wang, Y.-R. Lv, H. Xu and S.-Q. Zang, Metal-organic framework-derived Co<sub>9</sub>S<sub>8</sub> embedded in N, O and S-tridoped carbon nanomaterials as an efficient oxygen bifunctional electrocatalyst, *J. Mater. Chem. A*, 2019, **7**, 7389-7395.
- 8 Y.-R. Hong, S. Mhin, K.-M. Kim, W.-S. Han, H. Choi, G. Ali, K. Y. Chung, H. J. Lee, S.-I. Moon, S. Dutta, S. Sun, Y.-G. Jung, T. Song and H. Han, Electrochemically activated cobalt nickel sulfide for an efficient oxygen evolution reaction: partial amorphization and phase control, *J. Mater. Chem. A*, 2019, **7**, 3592-3602.
- 9 C. Qin, A. Fan, X. Zhang, S. Wang, X. Yuan and X. Dai, Interface engineering: few-layer MoS<sub>2</sub> coupled to a NiCo-sulfide nanosheet heterostructure as a bifunctional electrocatalyst for overall water splitting, *J. Mater. Chem. A*, 2019, **7**, 27594-27602.
- 10 Y. Guo, J. Tang, Z. Wang, Y.-M. Kang, Y. Bando and Y. Yamauchi, Elaborately assembled core-shell structured metal sulfides as a bifunctional catalyst for highly efficient electrochemical overall water splitting, *Nano Energy*, 2018, **47**, 494-502.
